# Supplementary material for: Ball-Milling Preparation of the Drug–Drug Solid Form of Pioglitazone-Rosuvastatin at Different Molar Ratios: Characterization and Intrinsic Dissolution Rates Evaluation
Source: Pharmaceutics. 2023 Feb 13;15(2):630. doi: 10.3390/pharmaceutics15020630 (PMC9959797; doi:10.3390/pharmaceutics15020630)
Supplement: Supplementary file 1 [file pharmaceutics-15-00630-s001.zip › pharmaceutics-2161498-supplementary.pdf]

Supplementary Materials

# Ball-Milling Preparation of the Drug–Drug Solid form of Pioglitazone-Rosuvastatin at Different Molar Ratios: Characterization and Intrinsic Dissolution Rates Evaluation

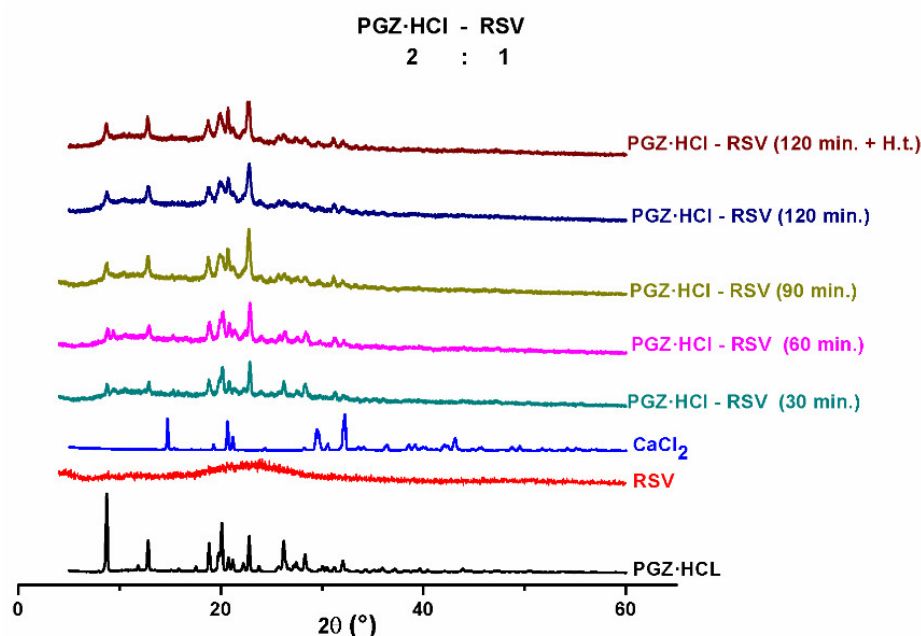

Figure S1. Diffractograms of the solid phase PGZ·HCl-RSV (2:1, EtOH) extending the reaction times.

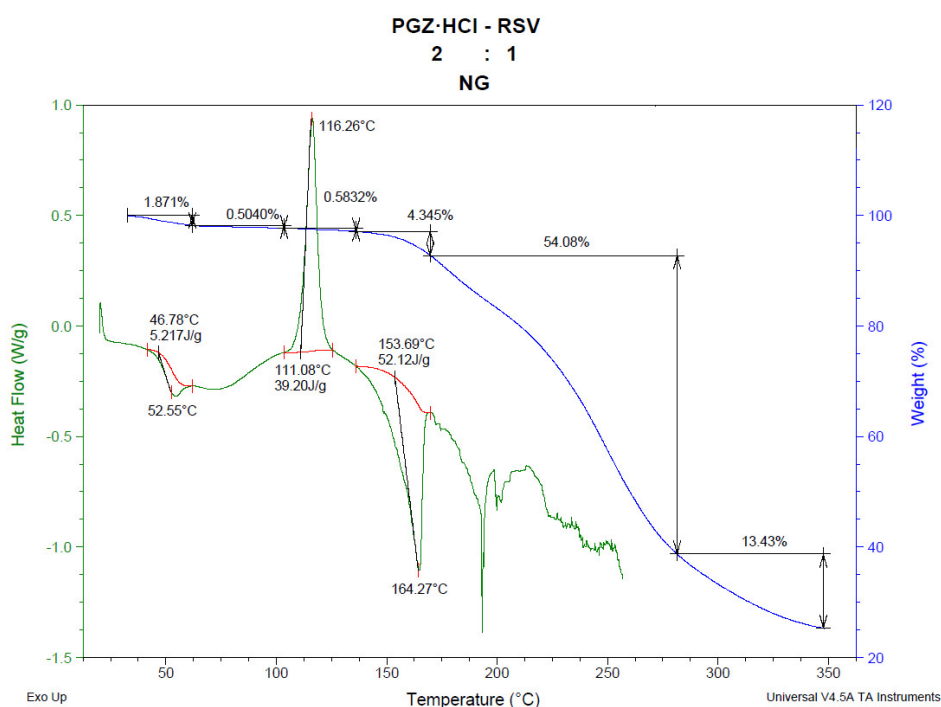

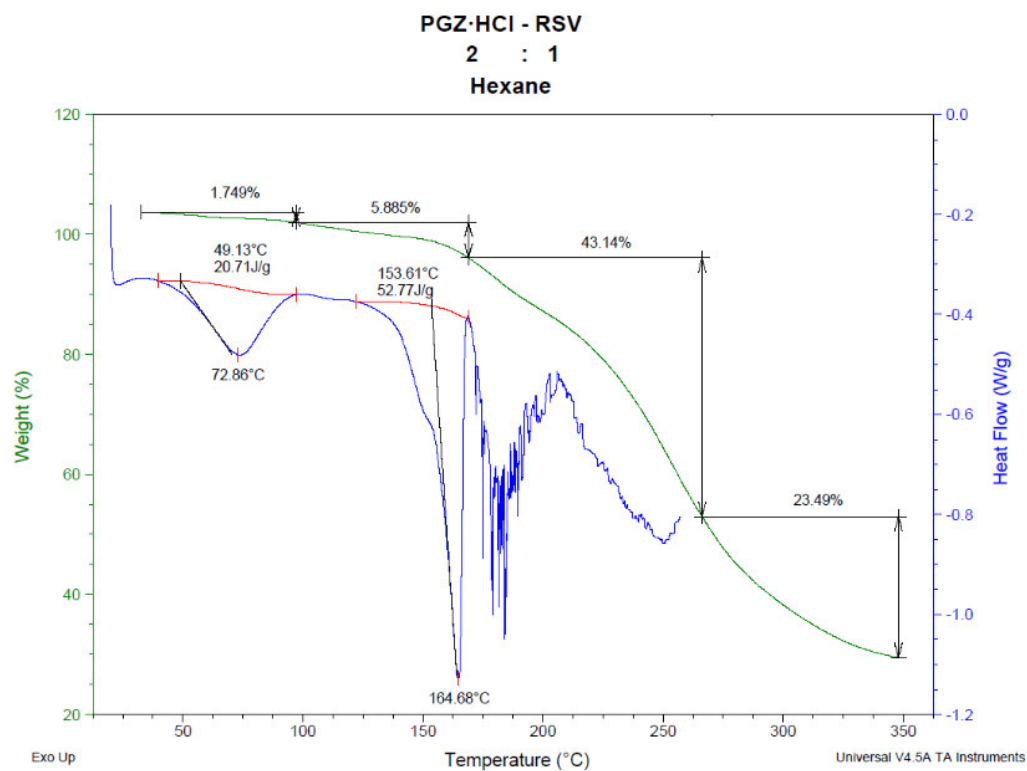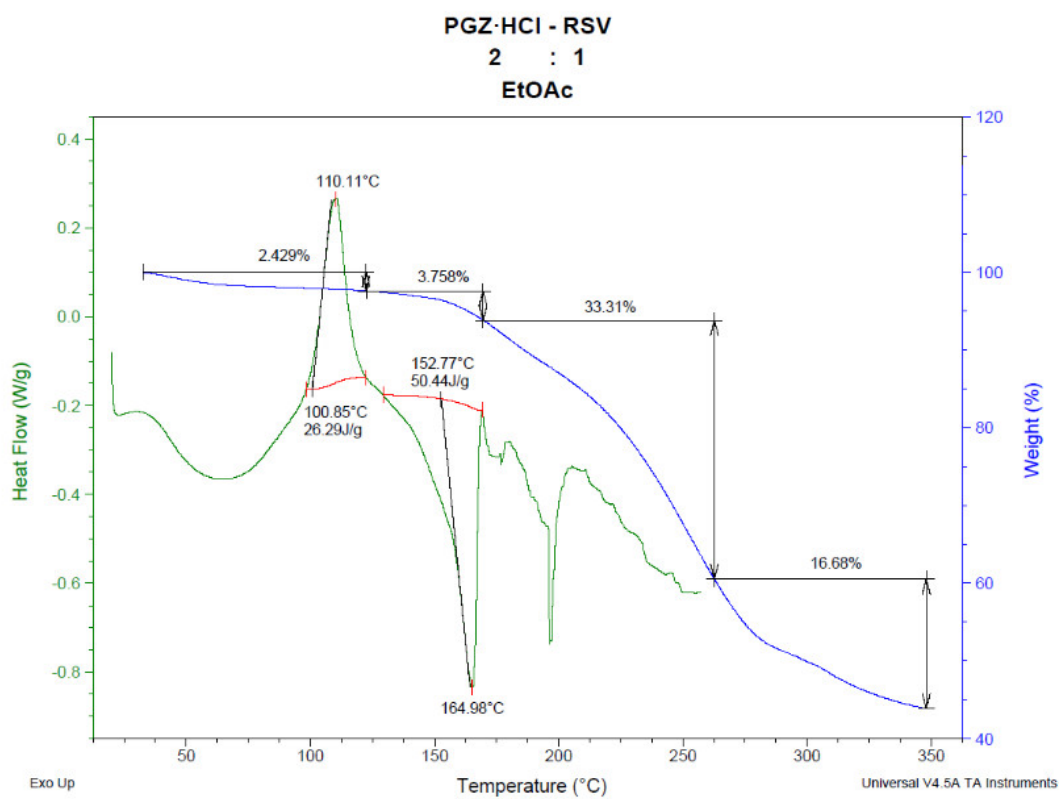

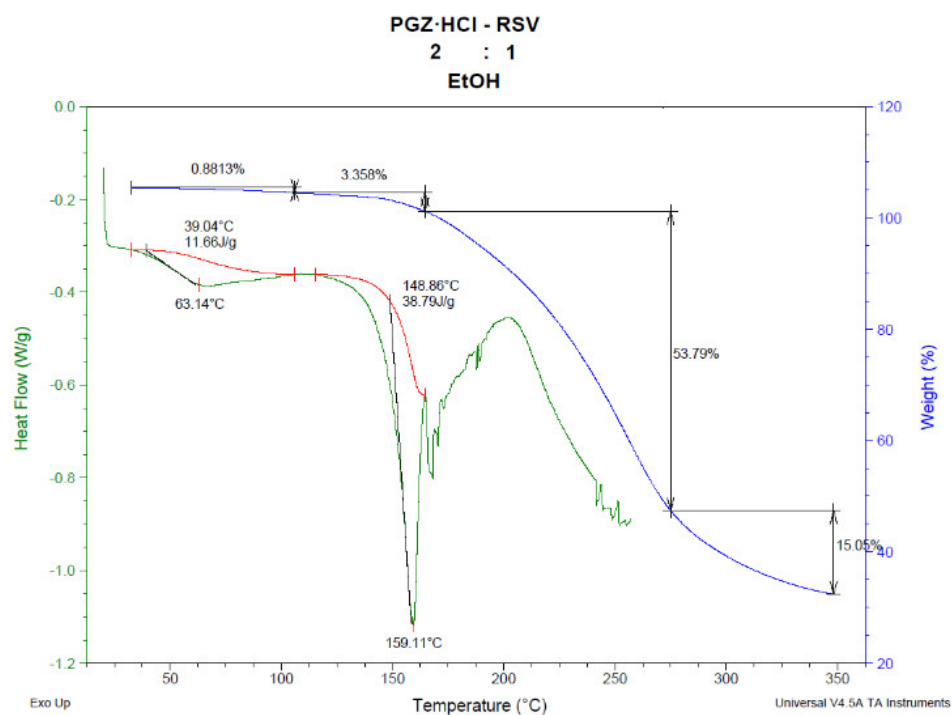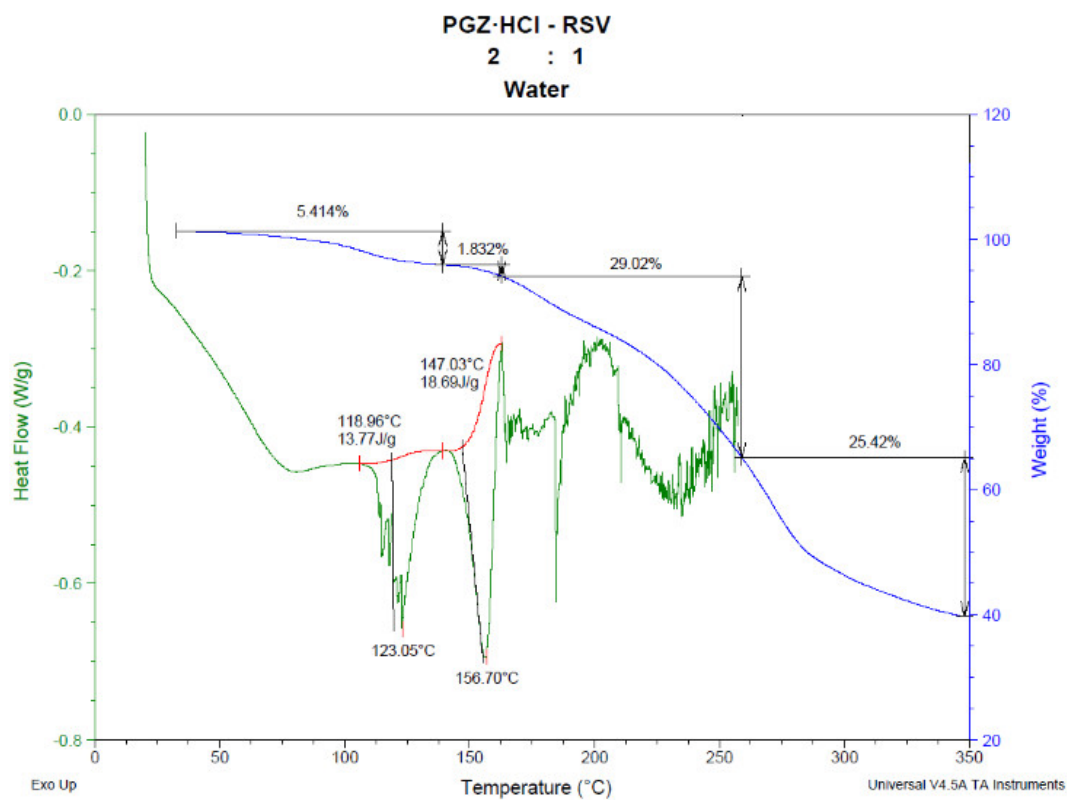

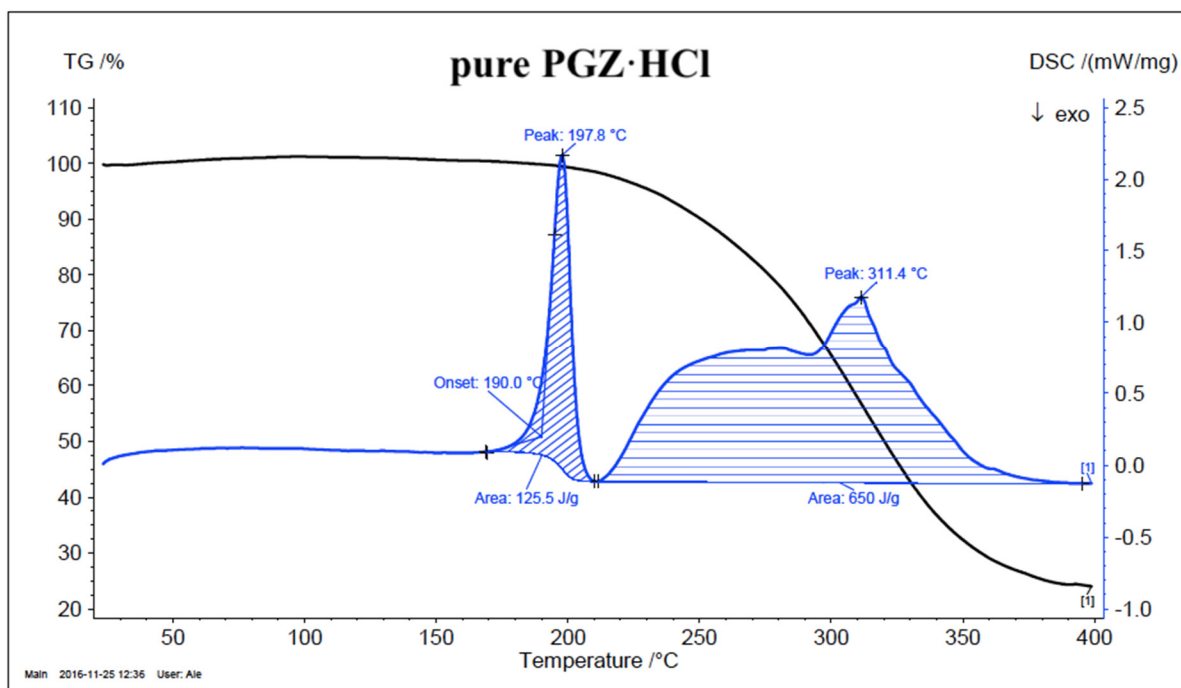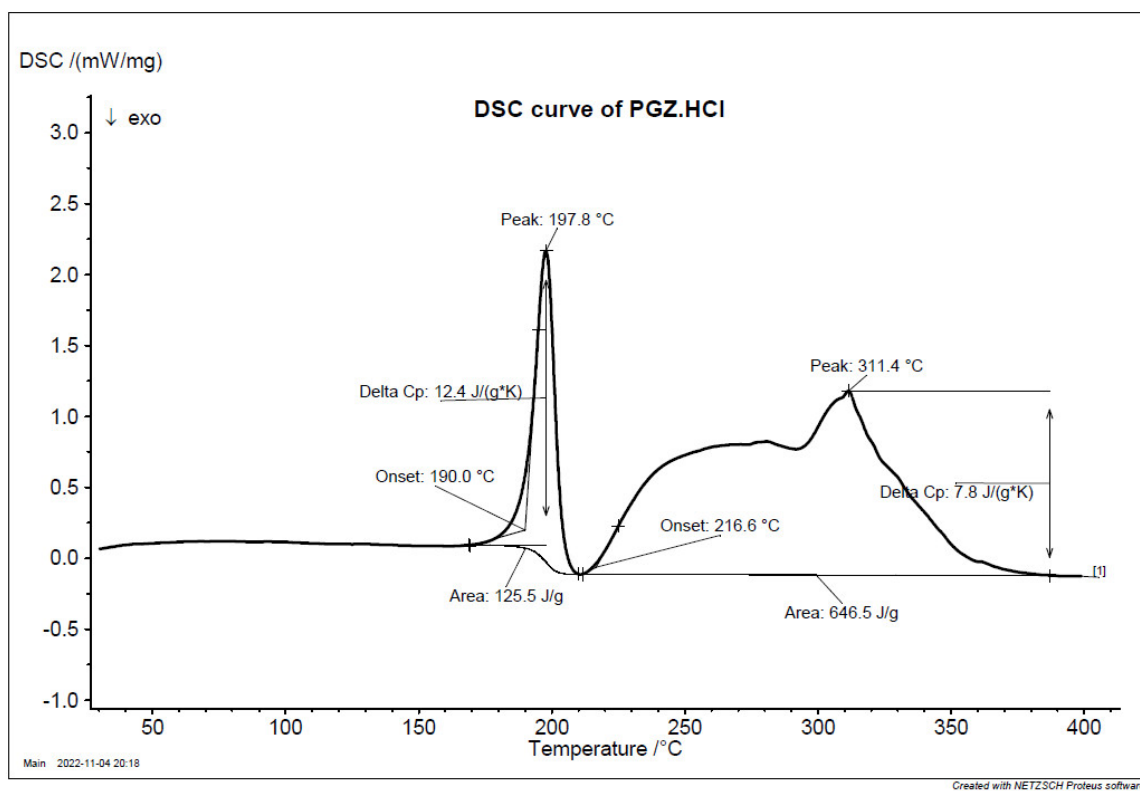

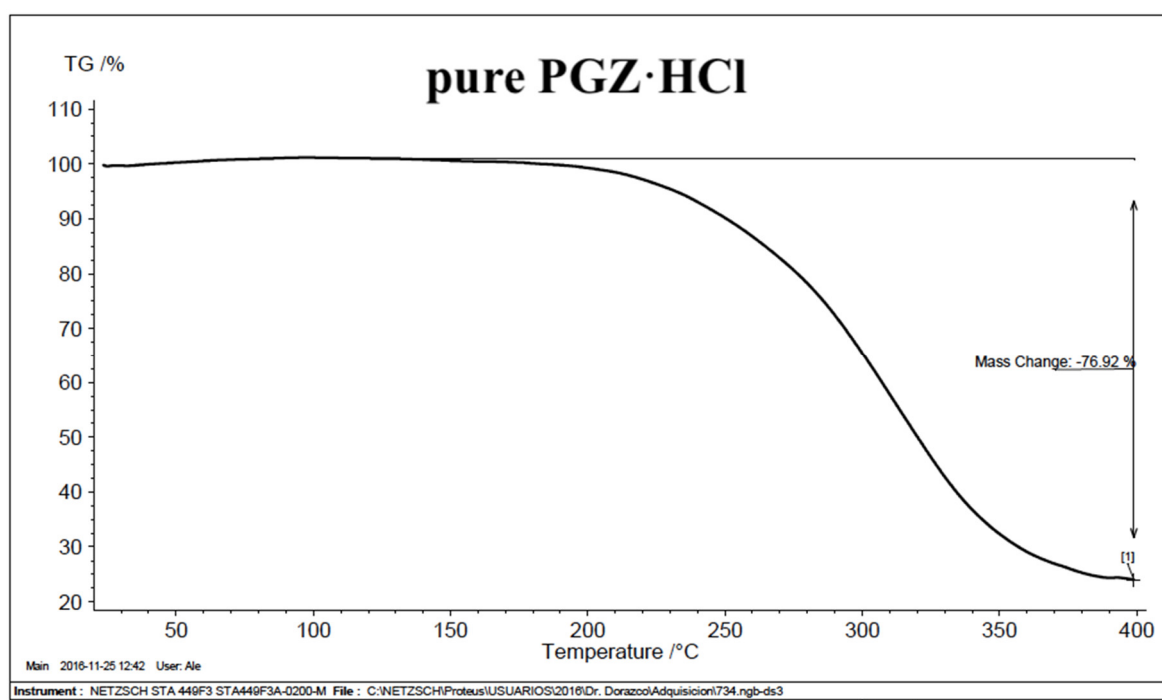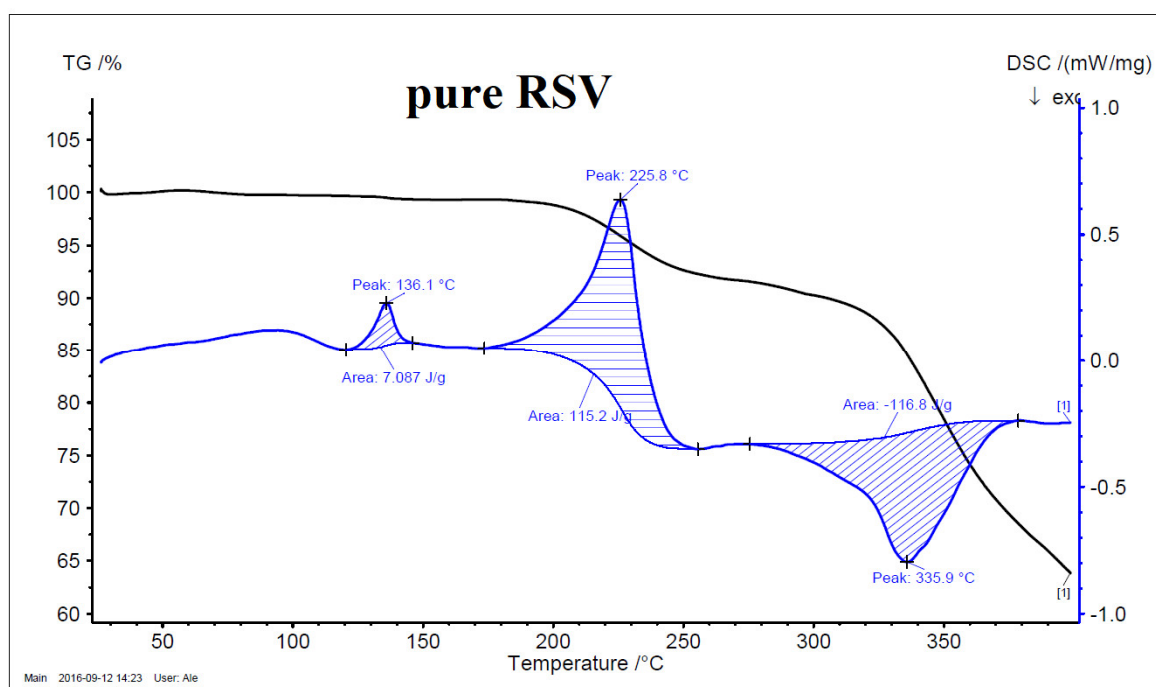

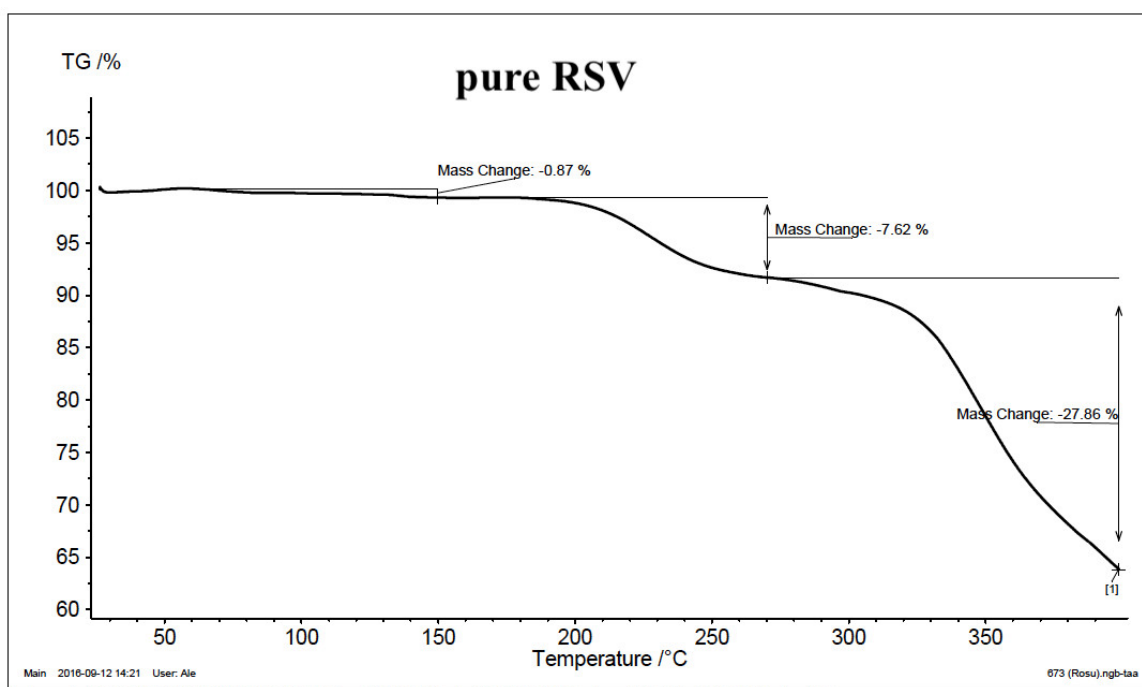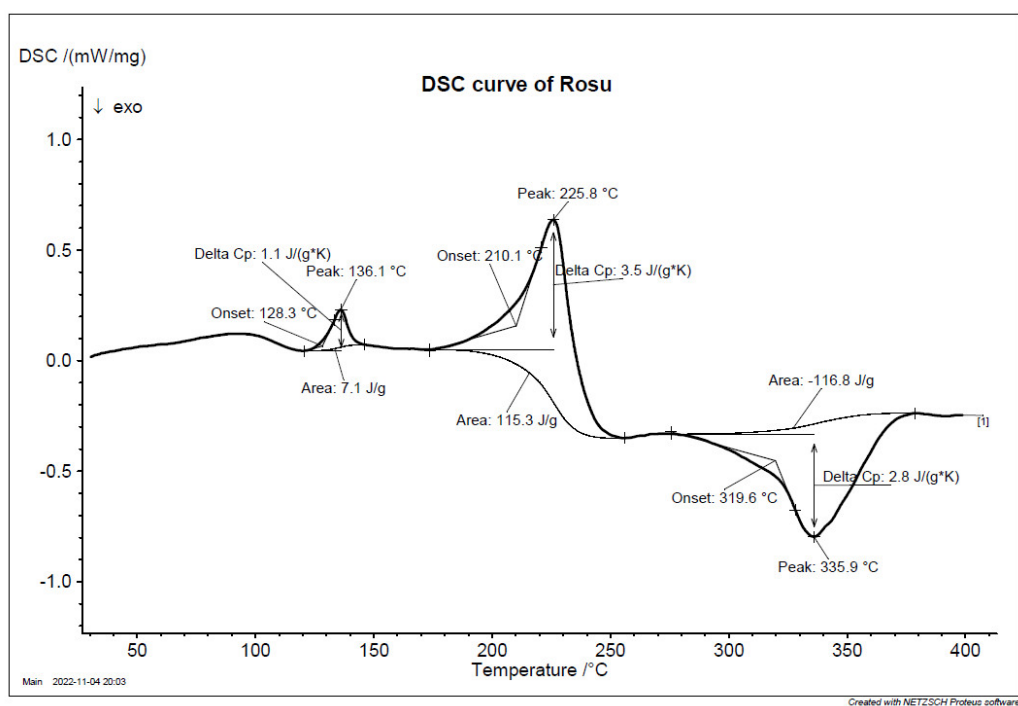

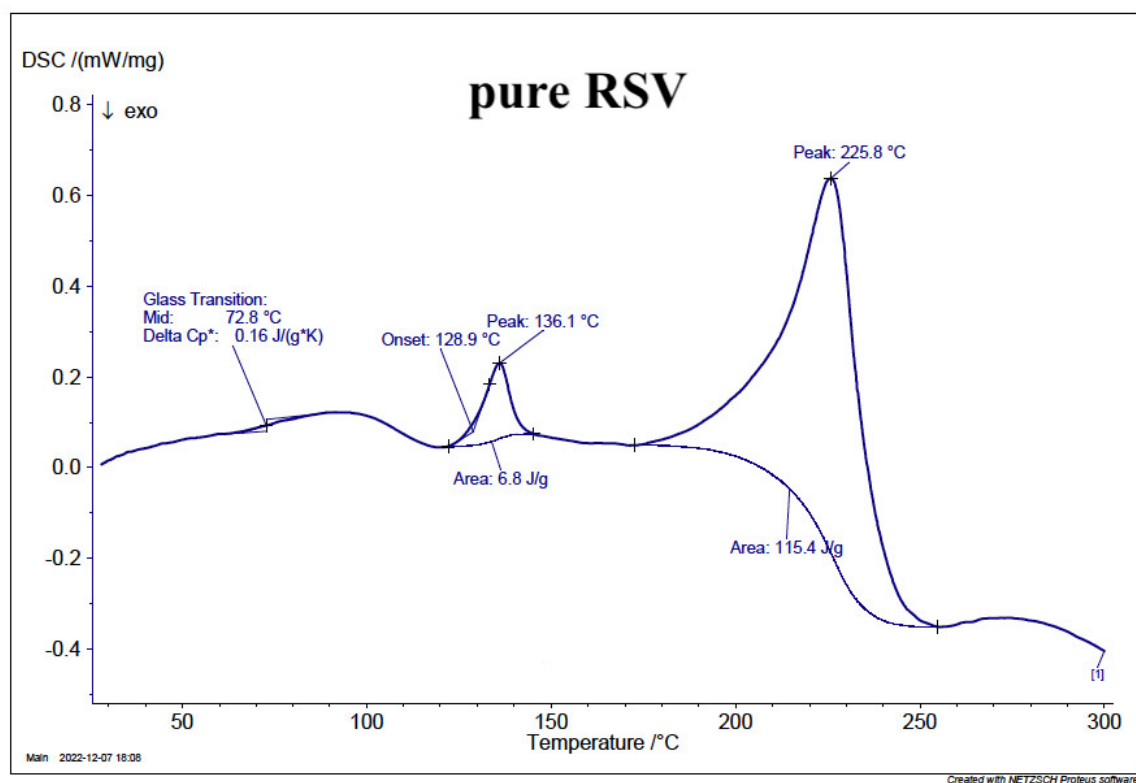

**Figure S2.** Individual DSC-TGA thermograms of the solid phases PGZ·HCl-RSV (2:1) prepared by NG or LAG solvent-screening. Also, individual DSC-TGA thermograms of pure PGZ·HCl and RSV.

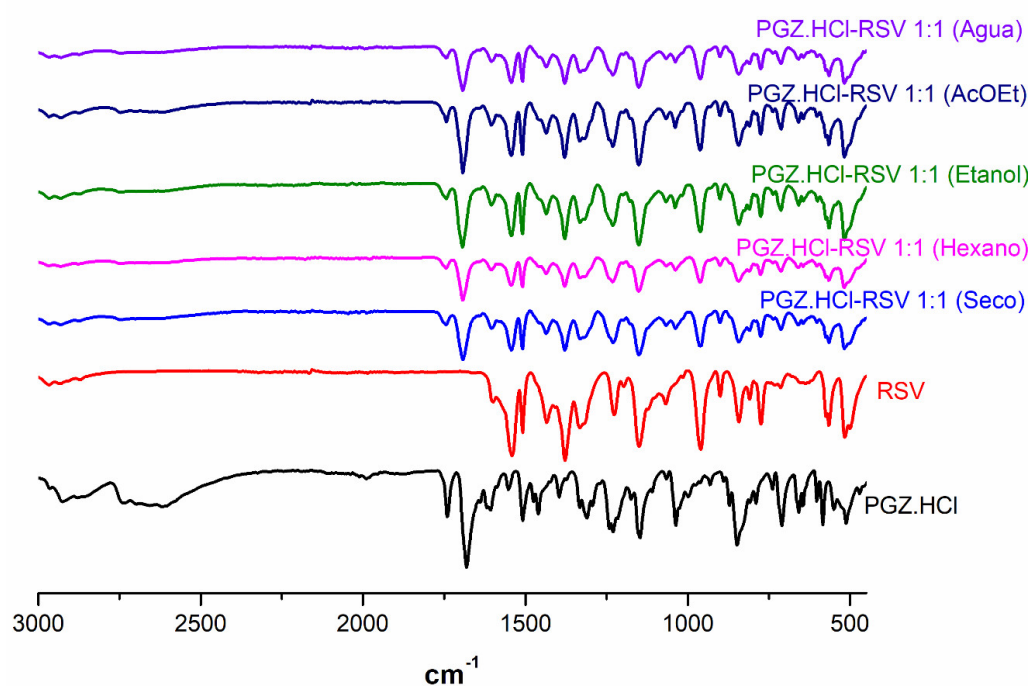

**Figure S3.** Full FT-IR spectra of the solid forms of PGZ·HCl-FLV (2:1) by NG or LAG solvent-screening

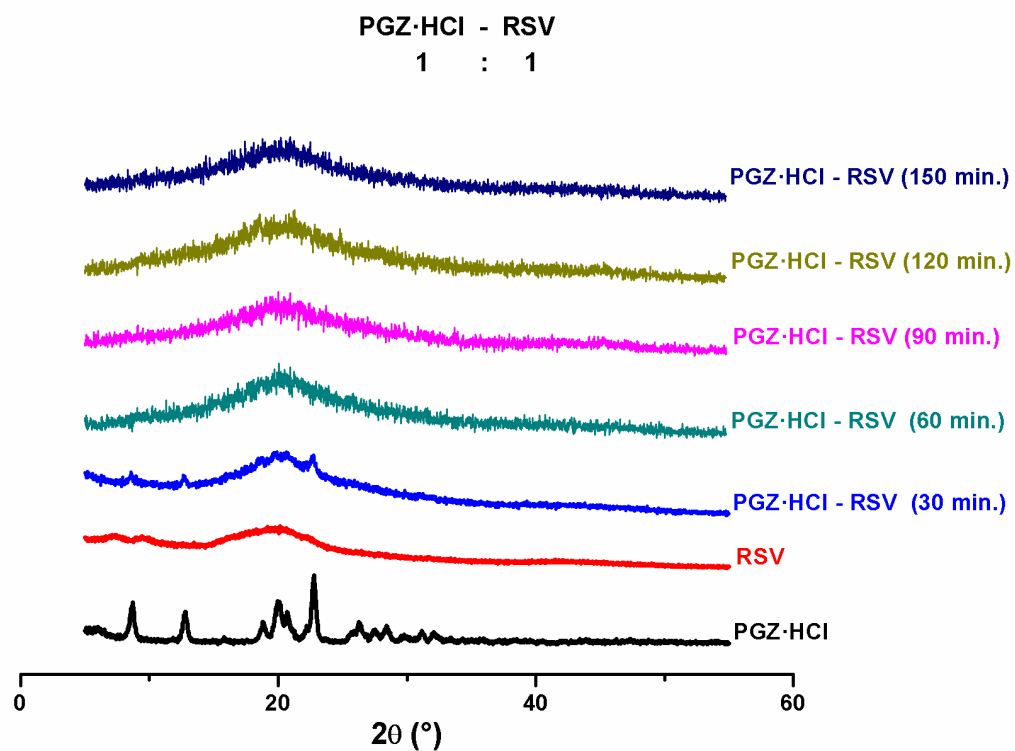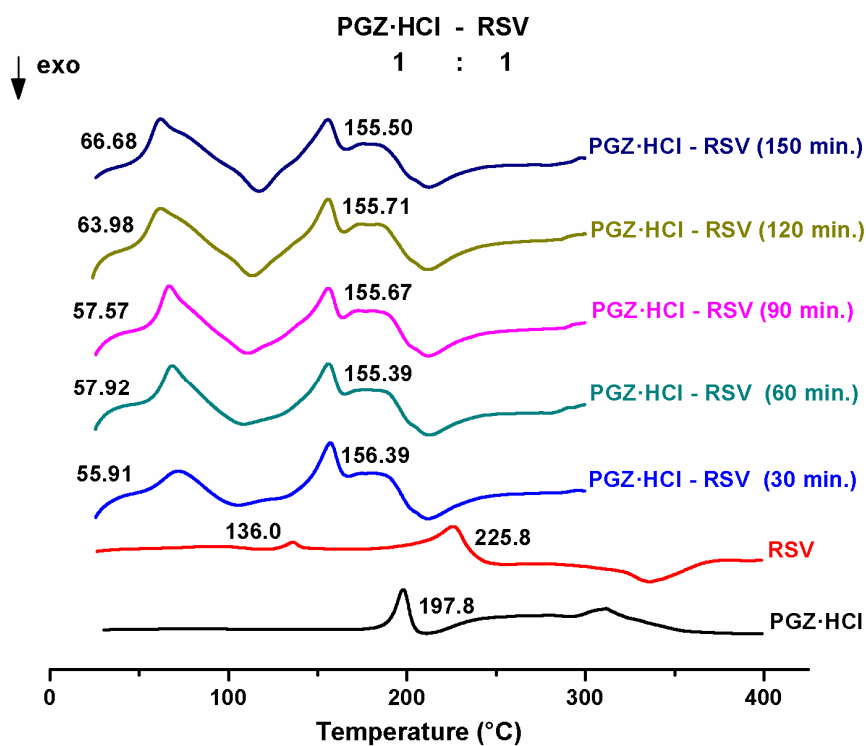

**Figure S4.** Grinding of the solid phase PGZ·HCl-RSV (1:1) at different times (30, 60, 90, 120, and 150 min). DSC-TGA and PXRD results.

### PGZ·HCl-RSV (1:1) 30 min

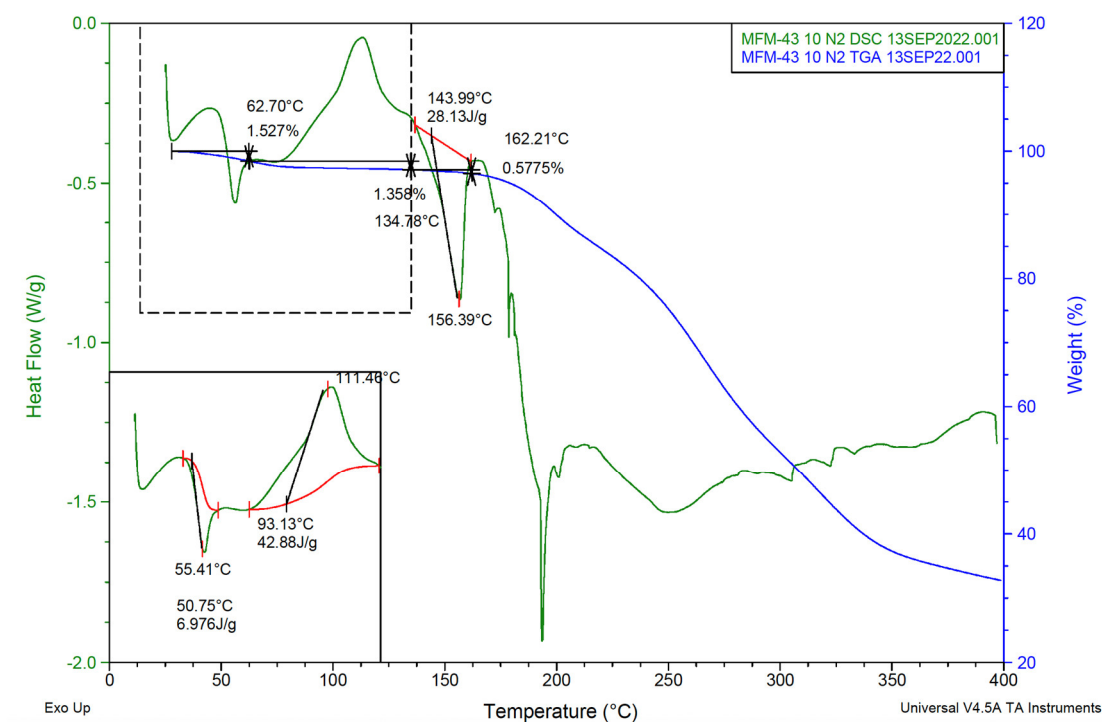

### PGZ·HCl-RSV (1:1) 60 min

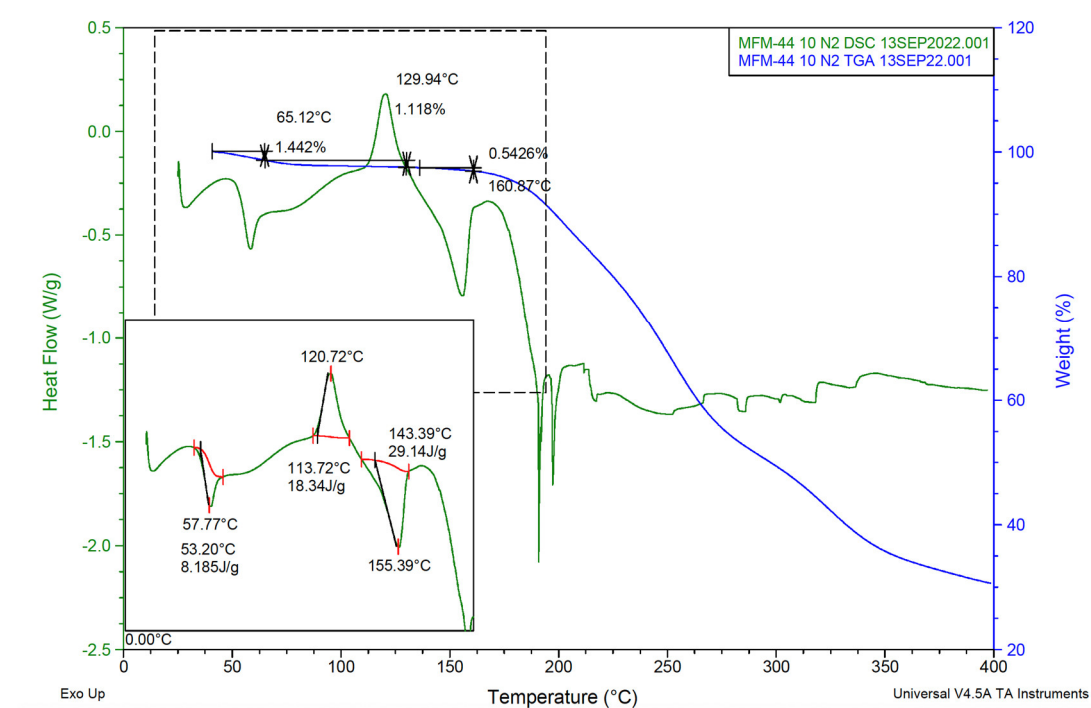

**PGZ·HCl-RSV (1:1) 90 min**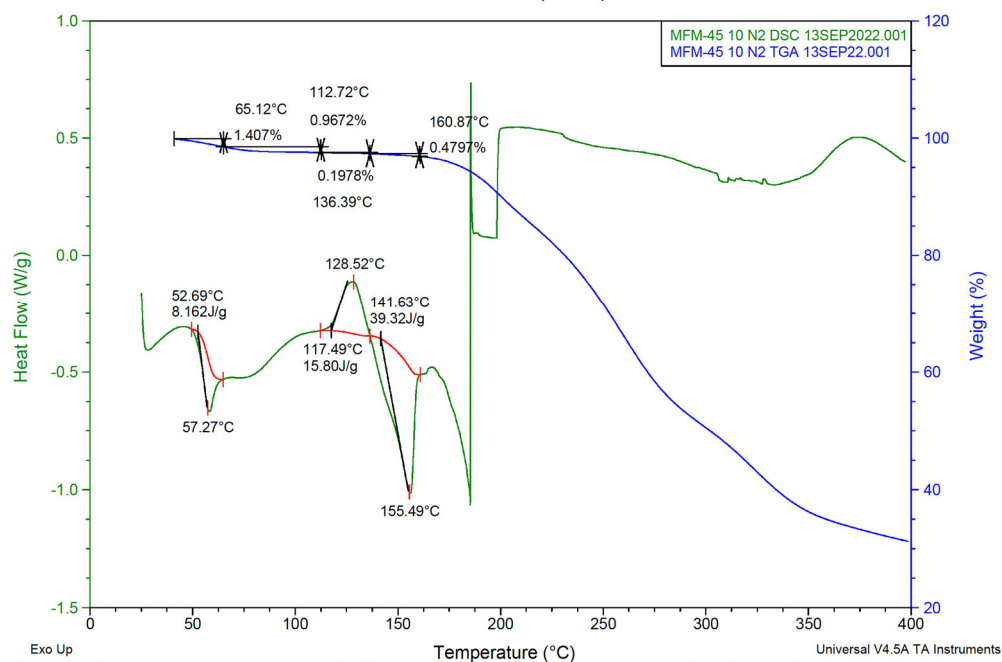**PGZ·HCl-RSV (1:1) 120 min**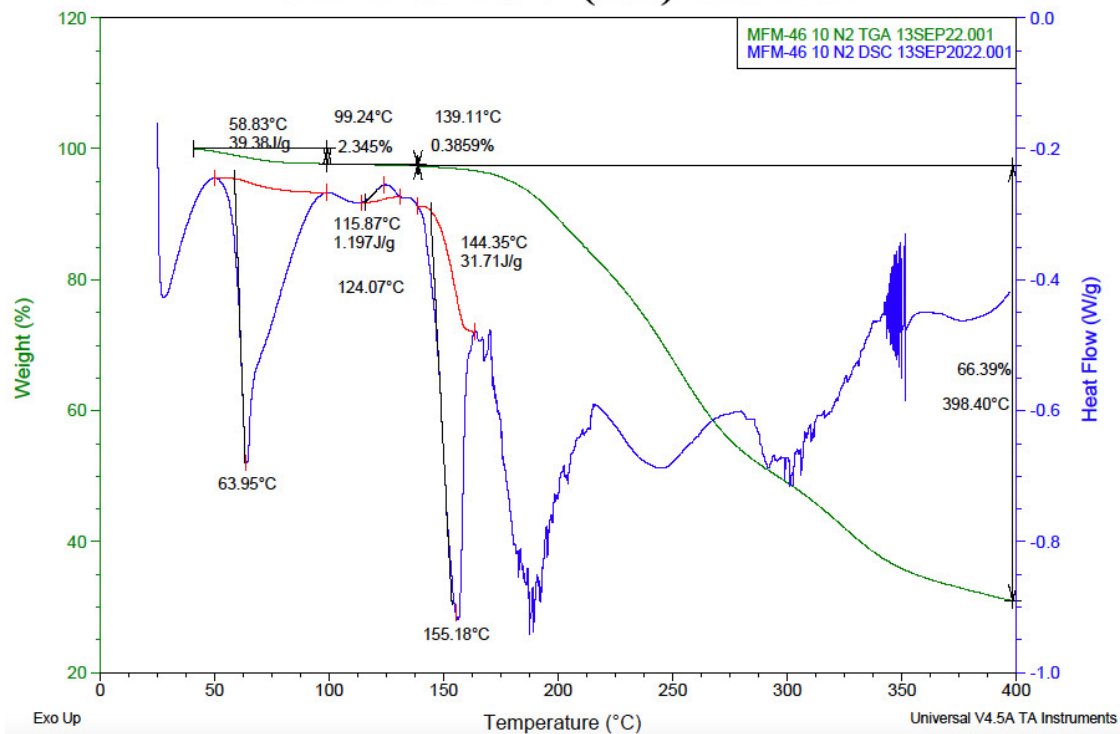

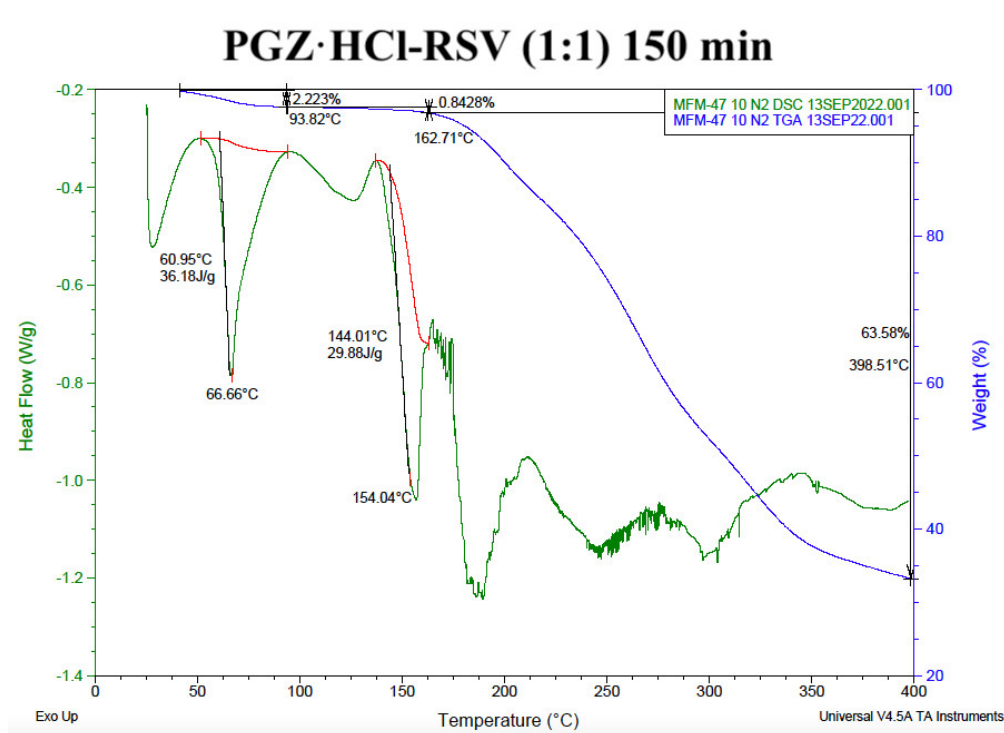

**Figure S5.** Individual DSC thermograms of the solid phase PGZ·HCl-RSV (1:1) at different grinding times (30, 60, 90, 120, and 150 min).

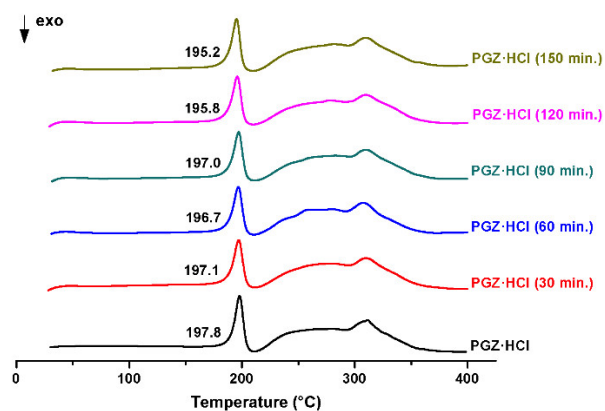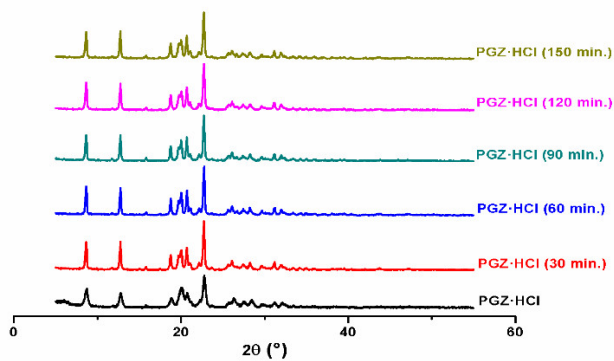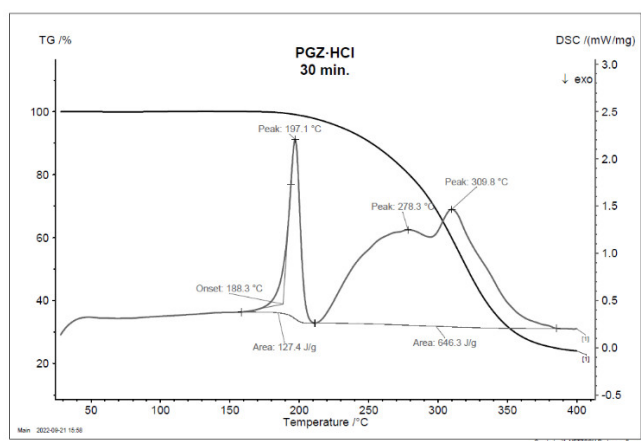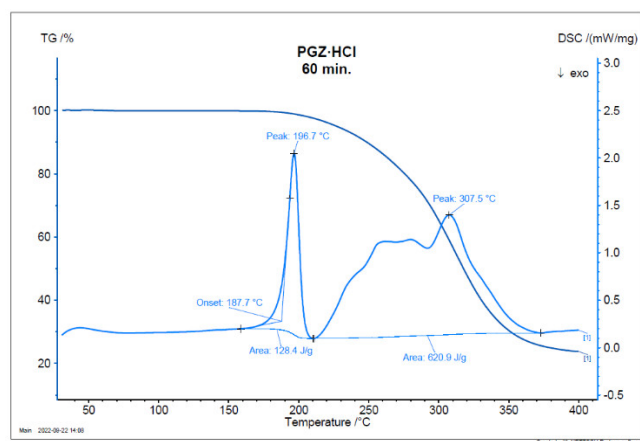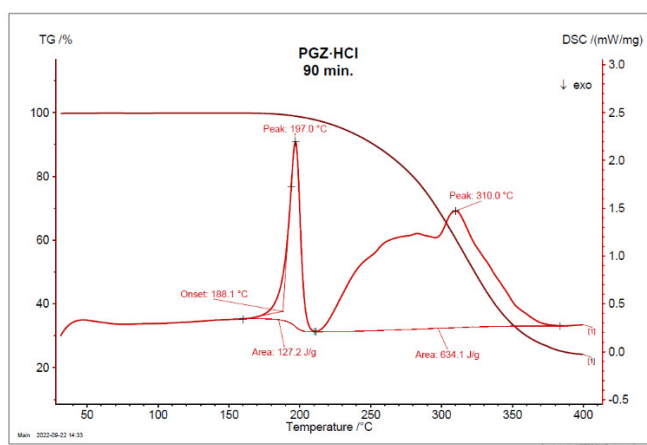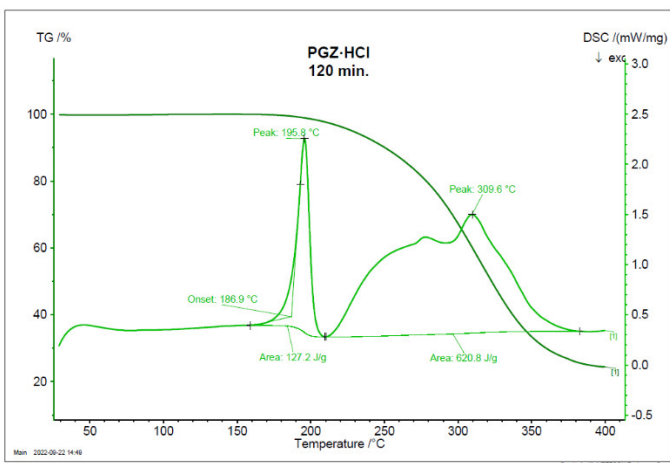

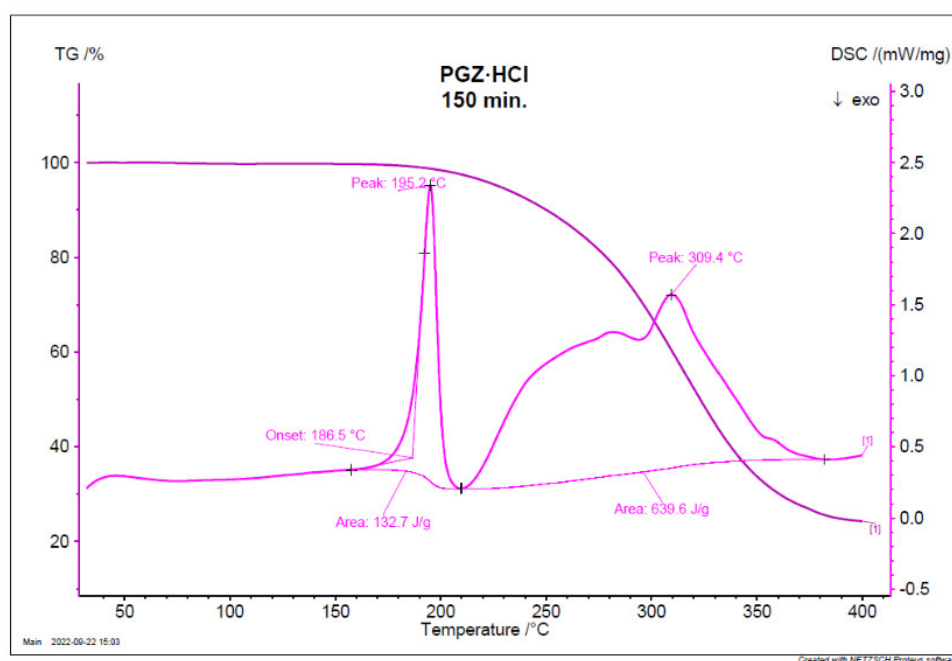

Figure S6. Evaluation of the amorphization ability of the PGZ·HCl

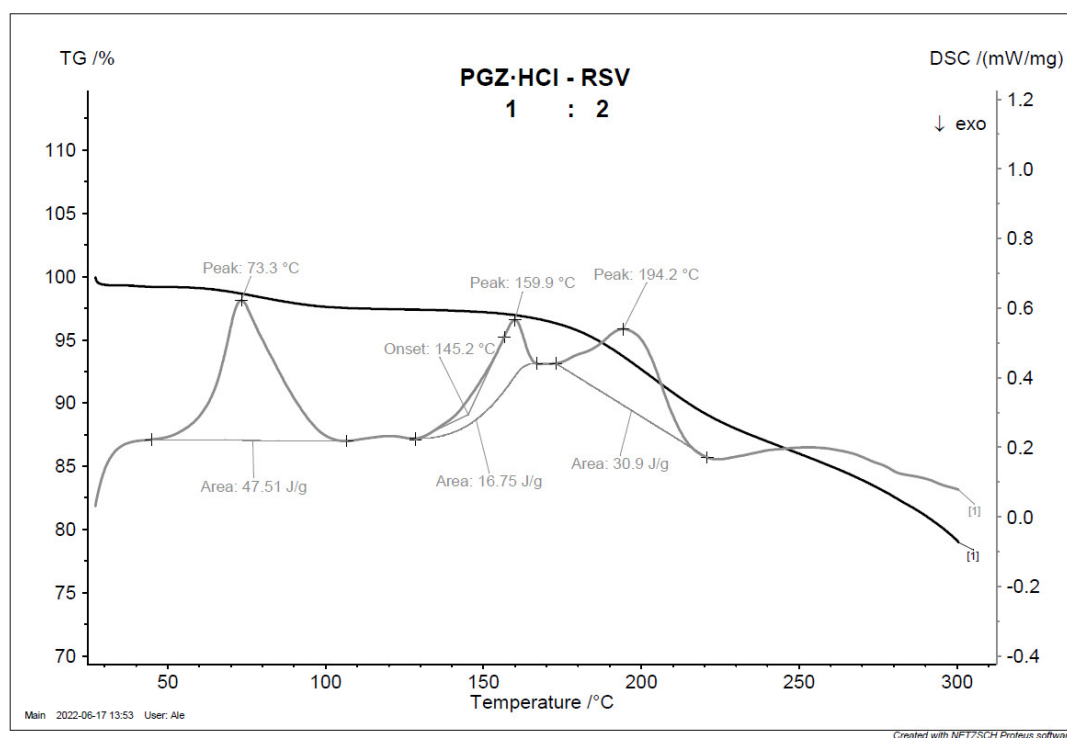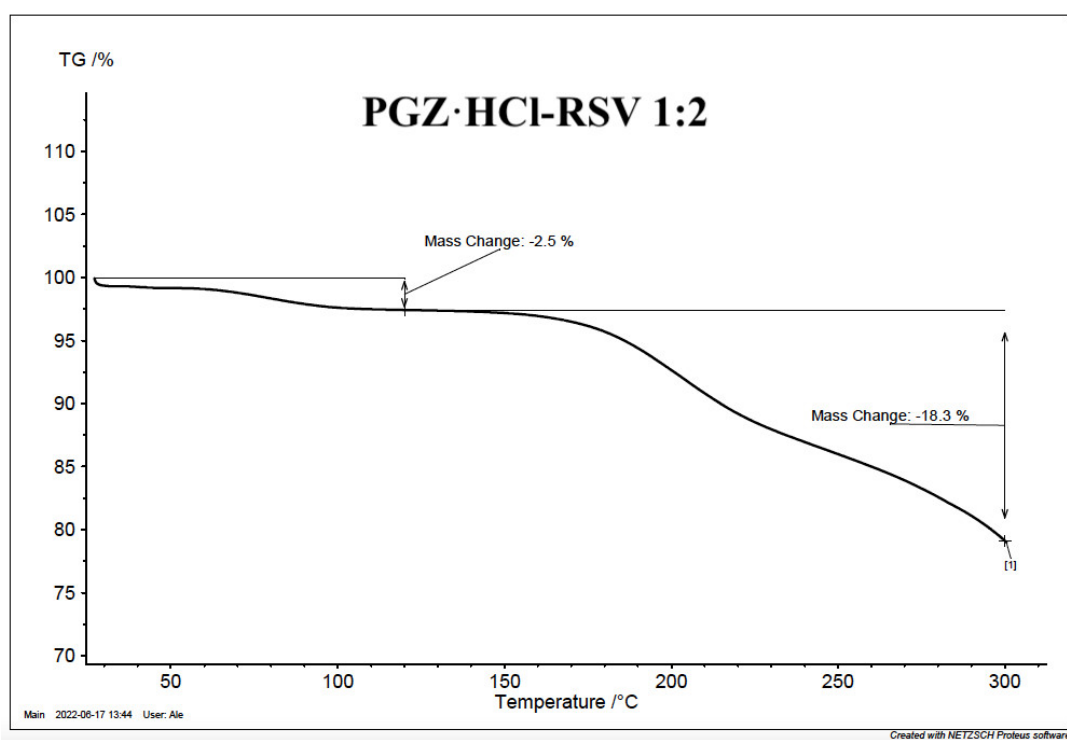

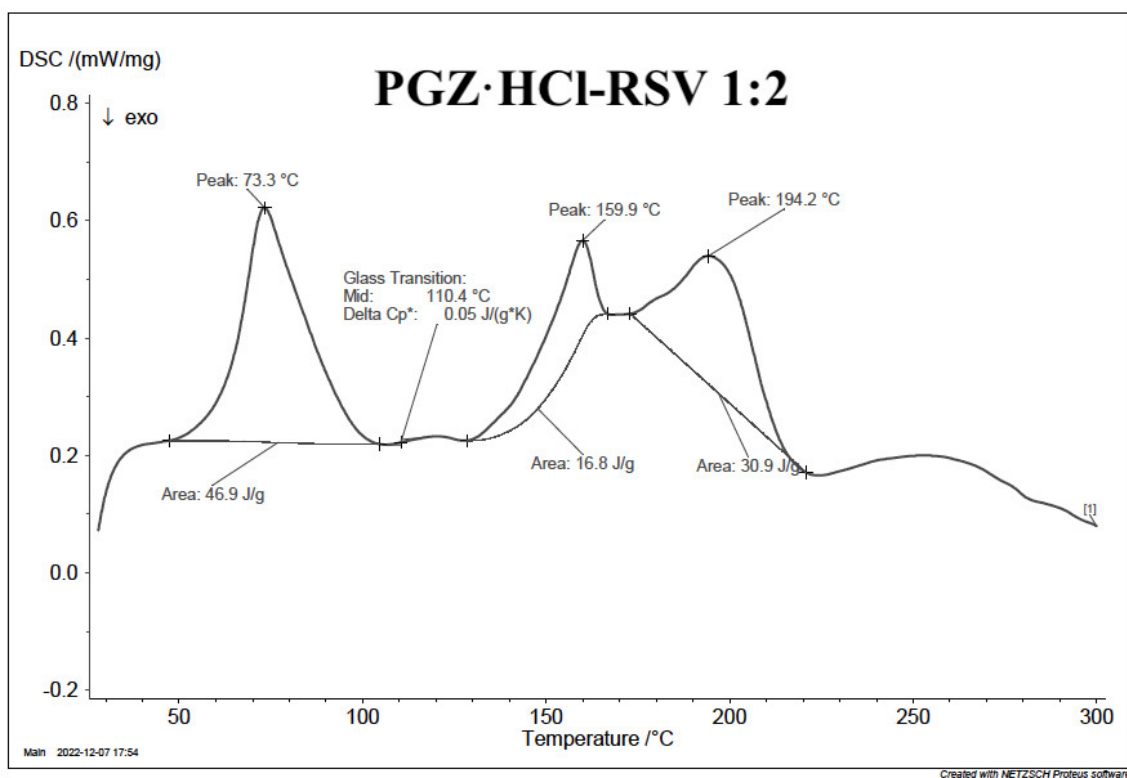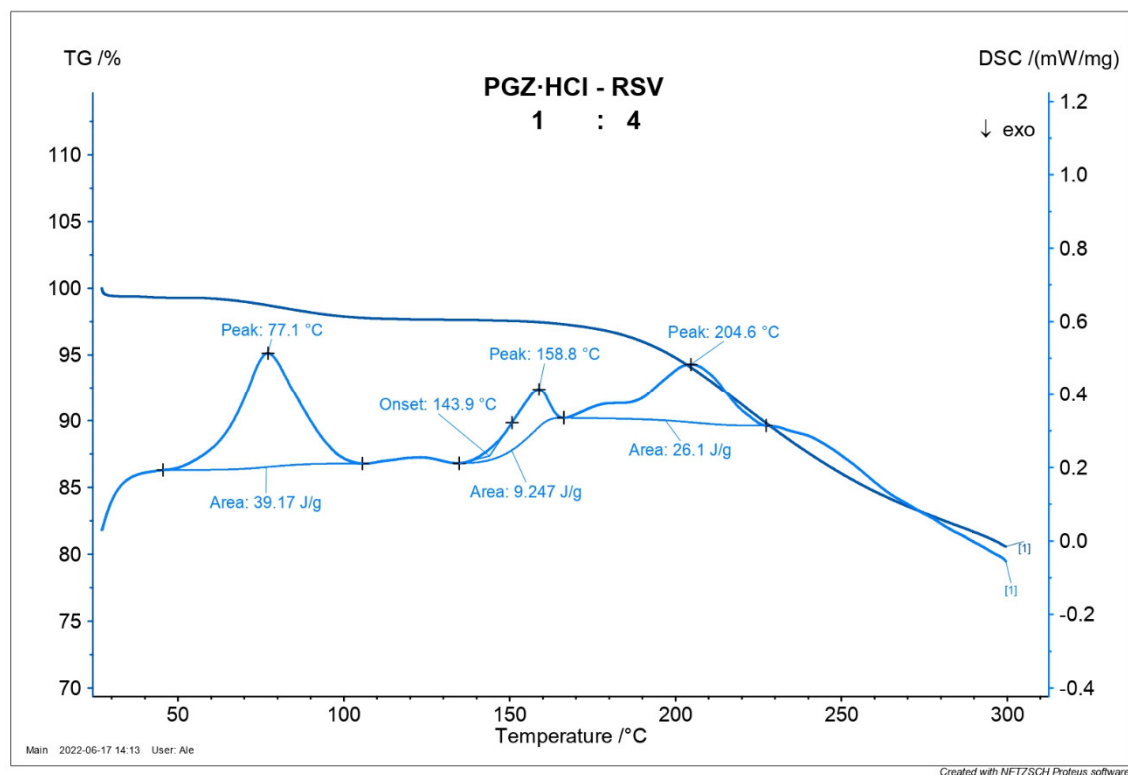

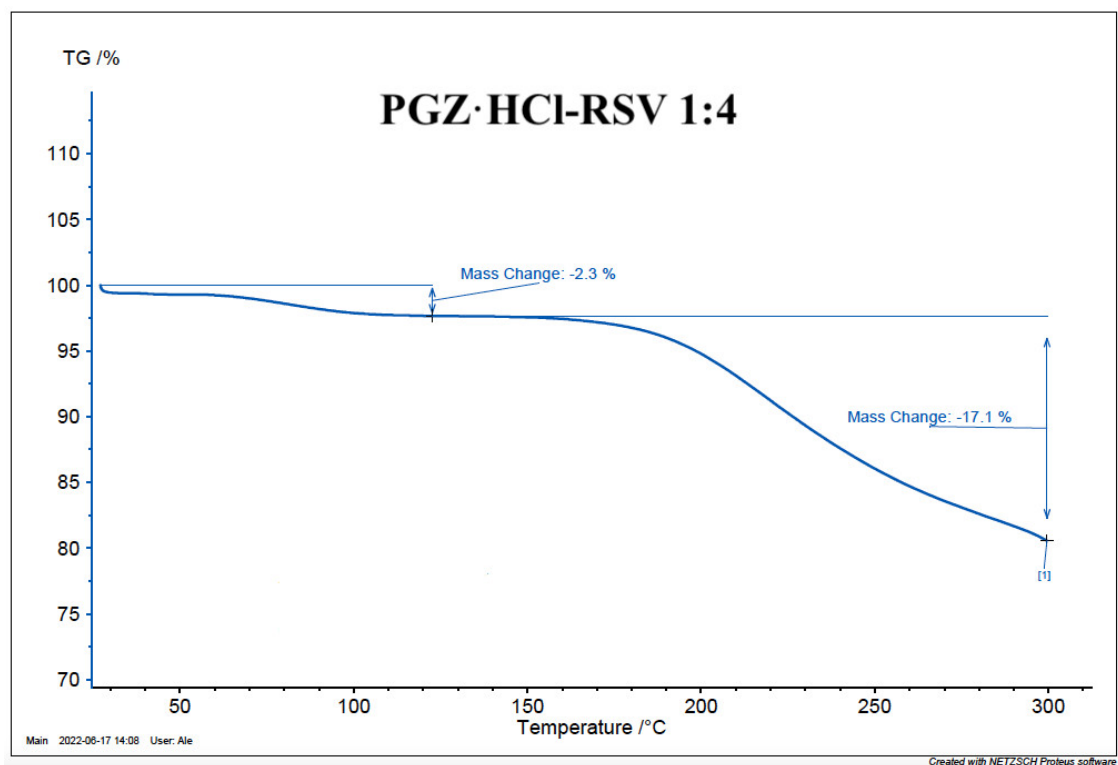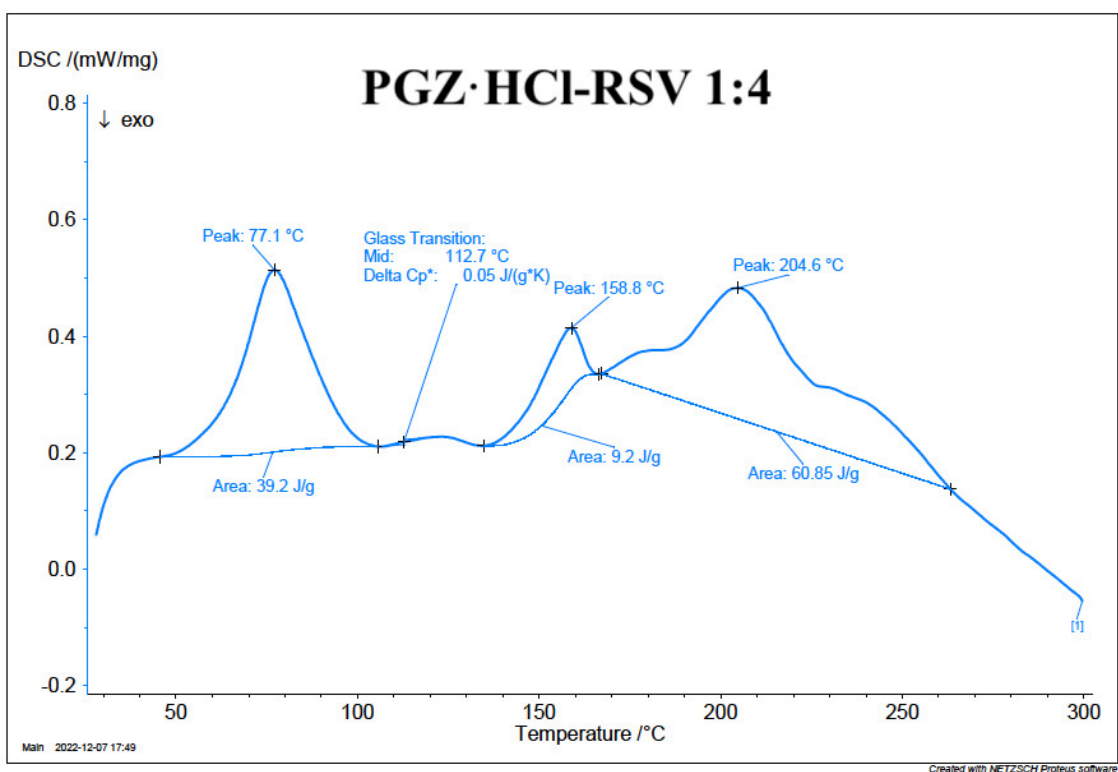

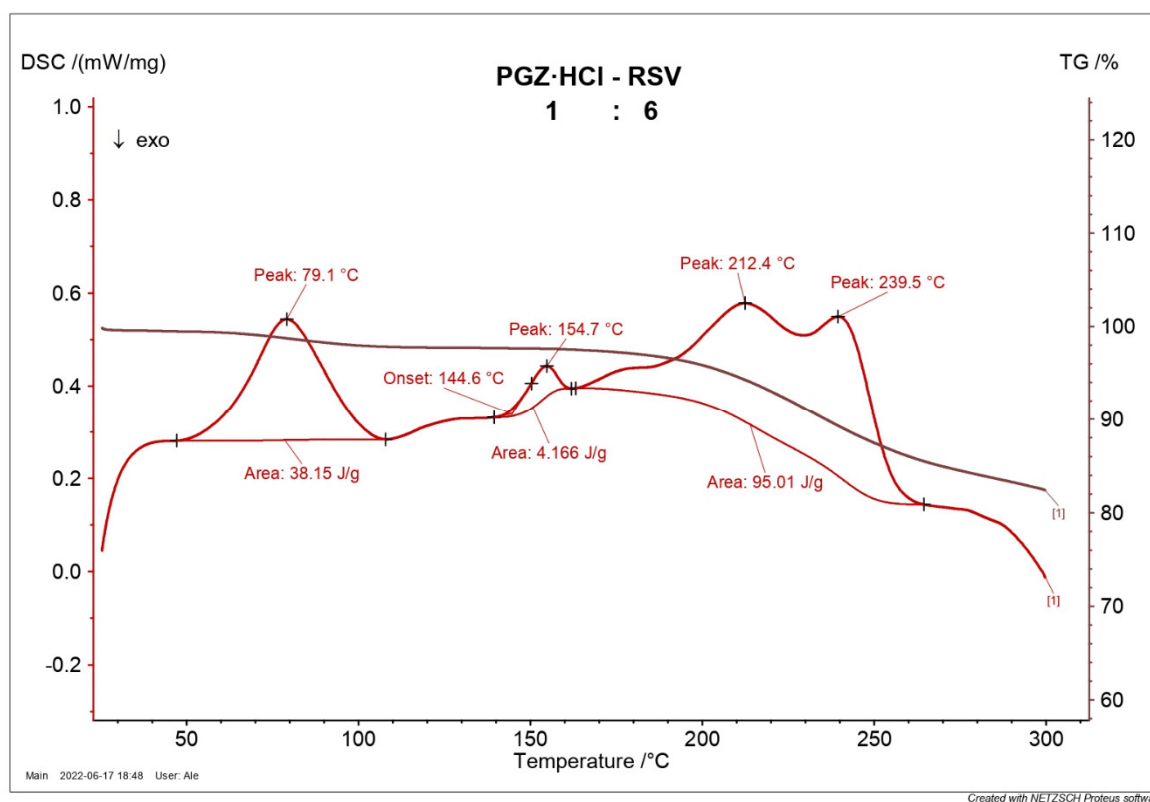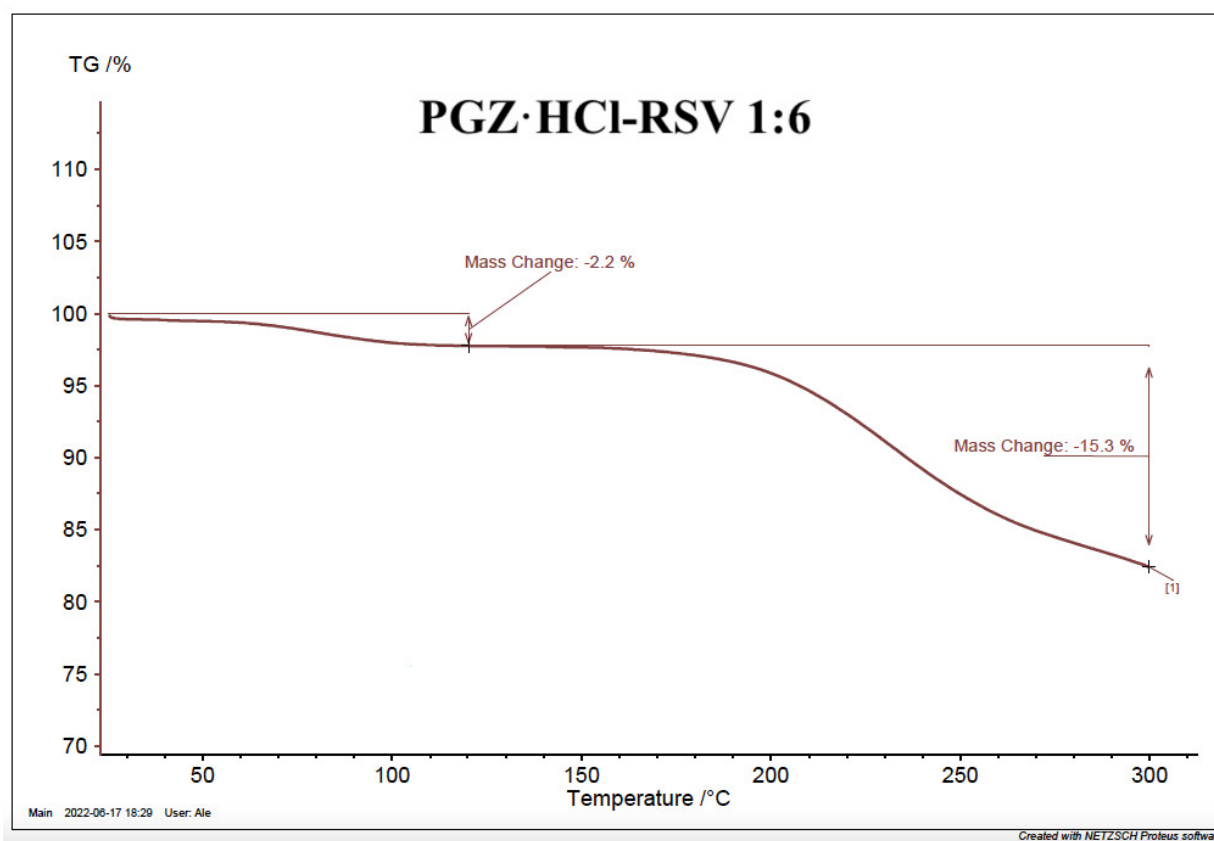

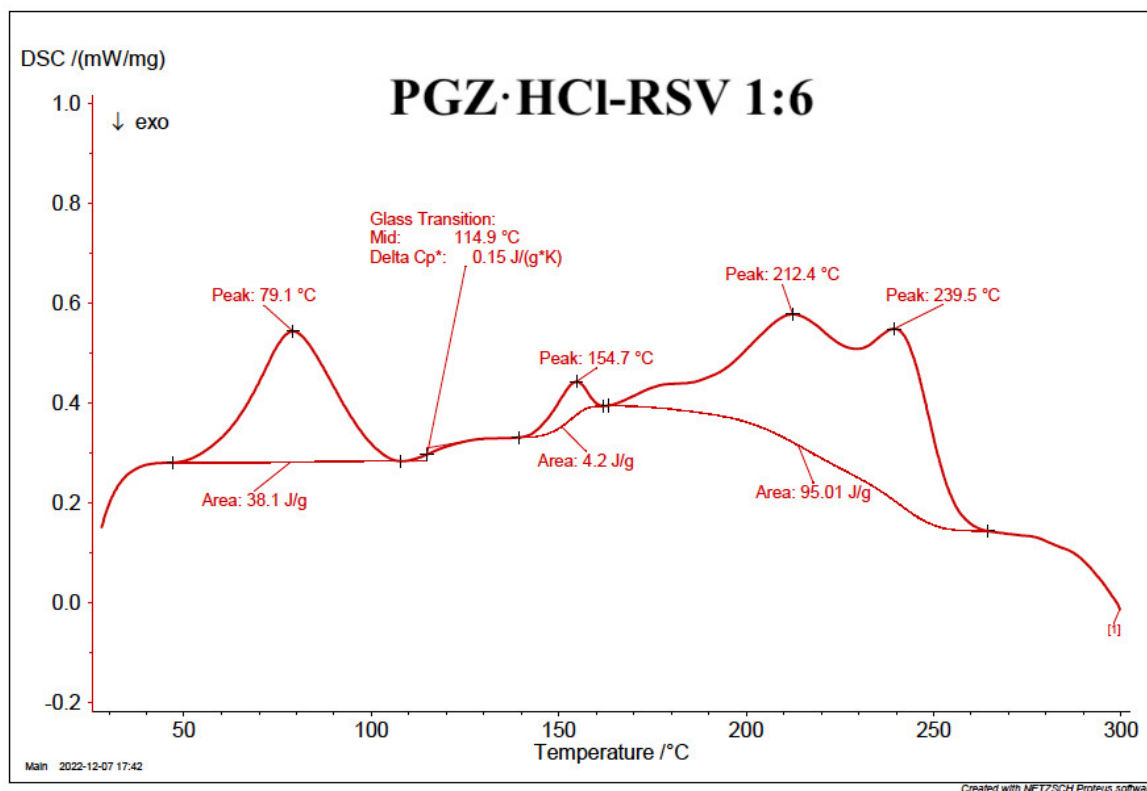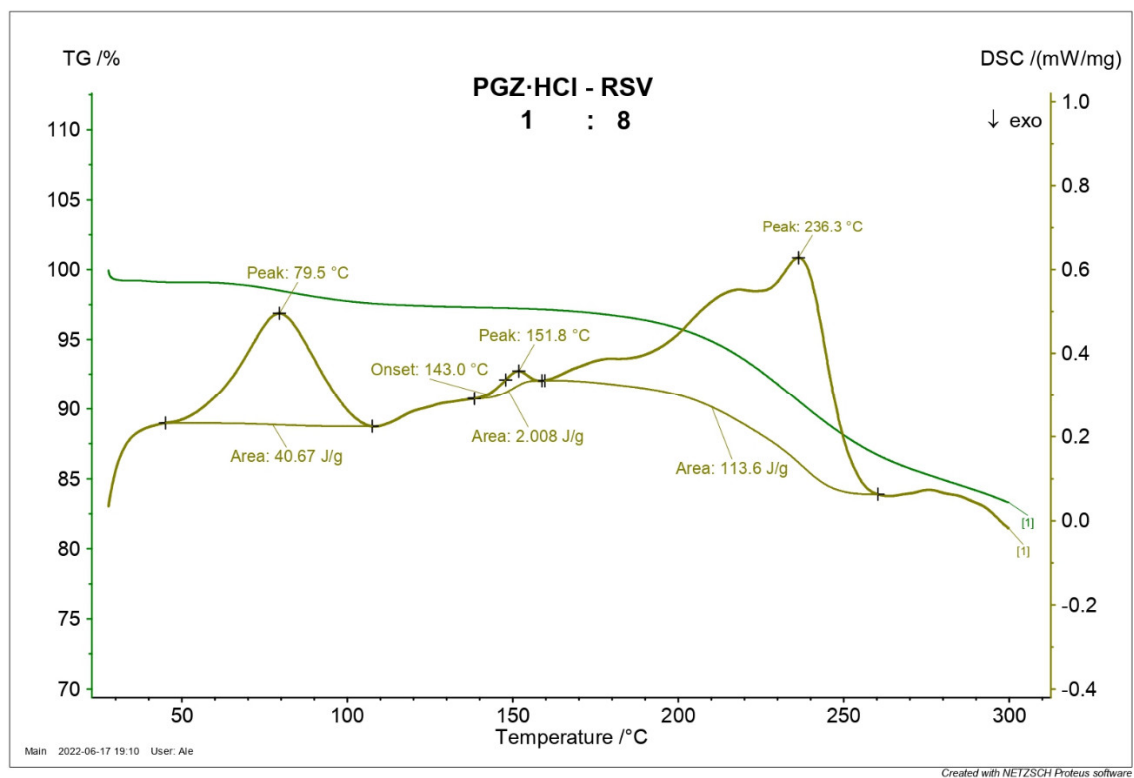

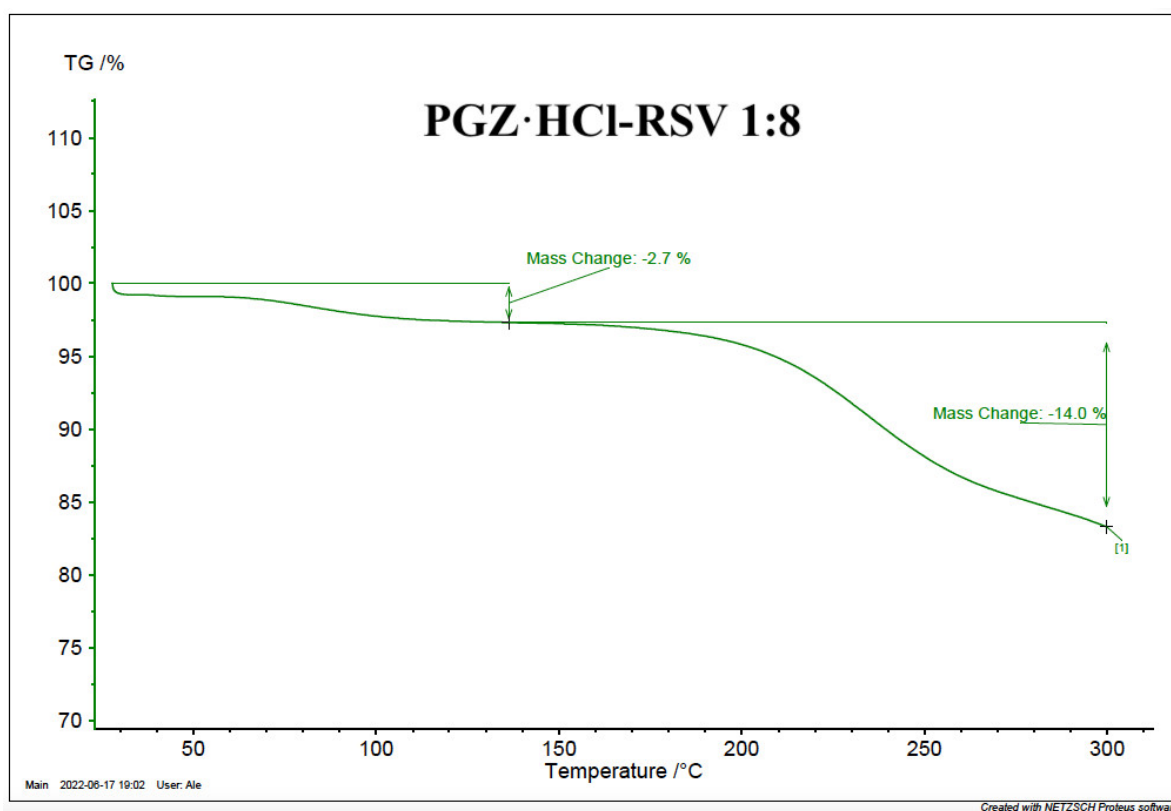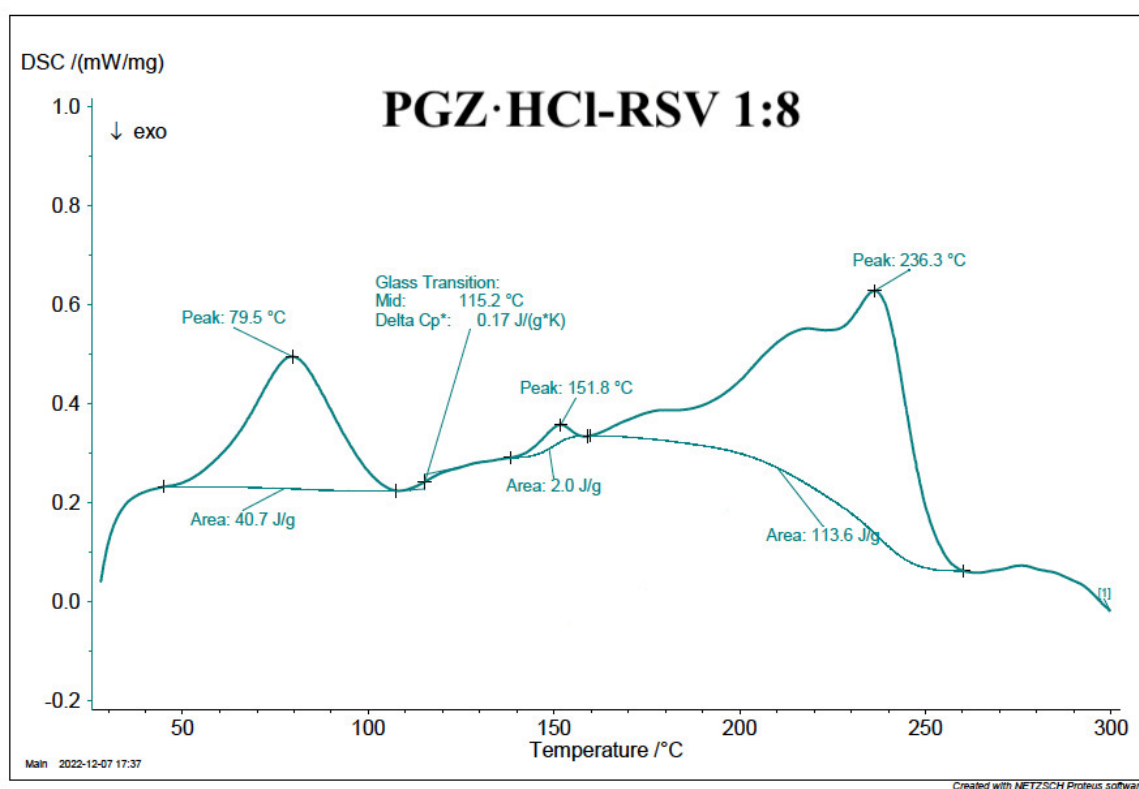

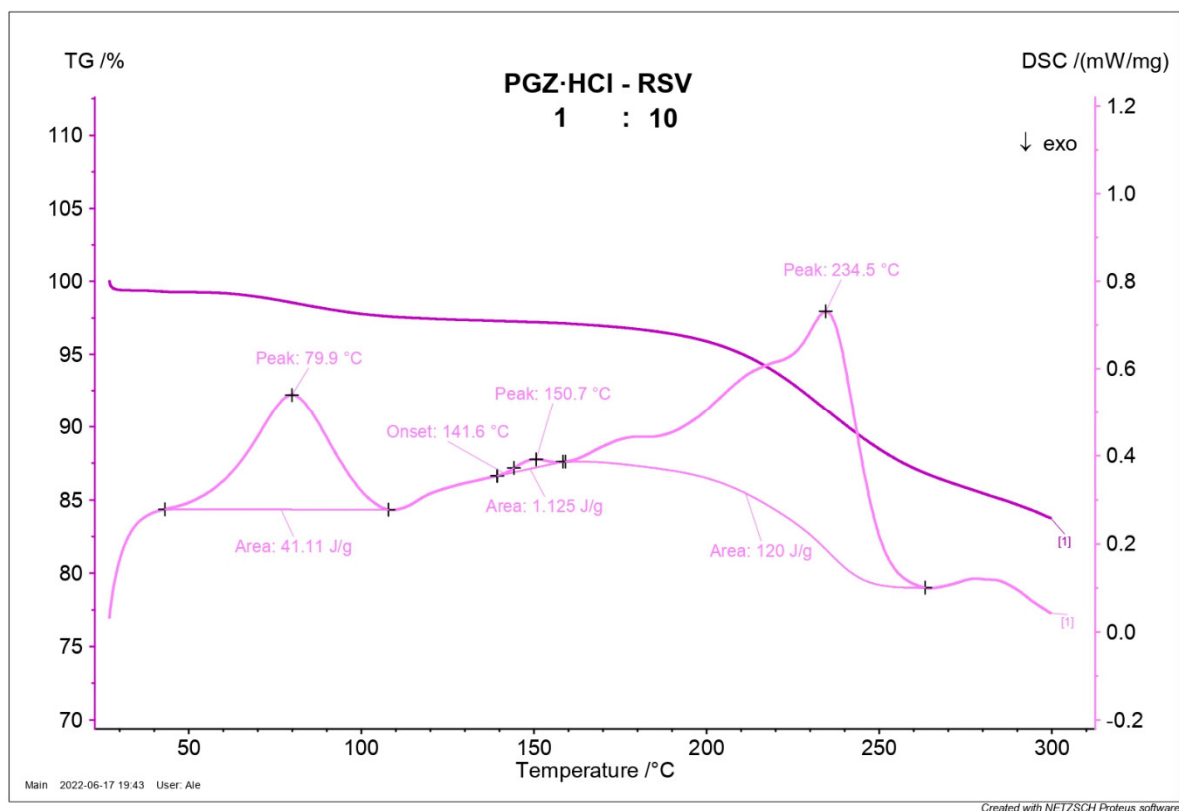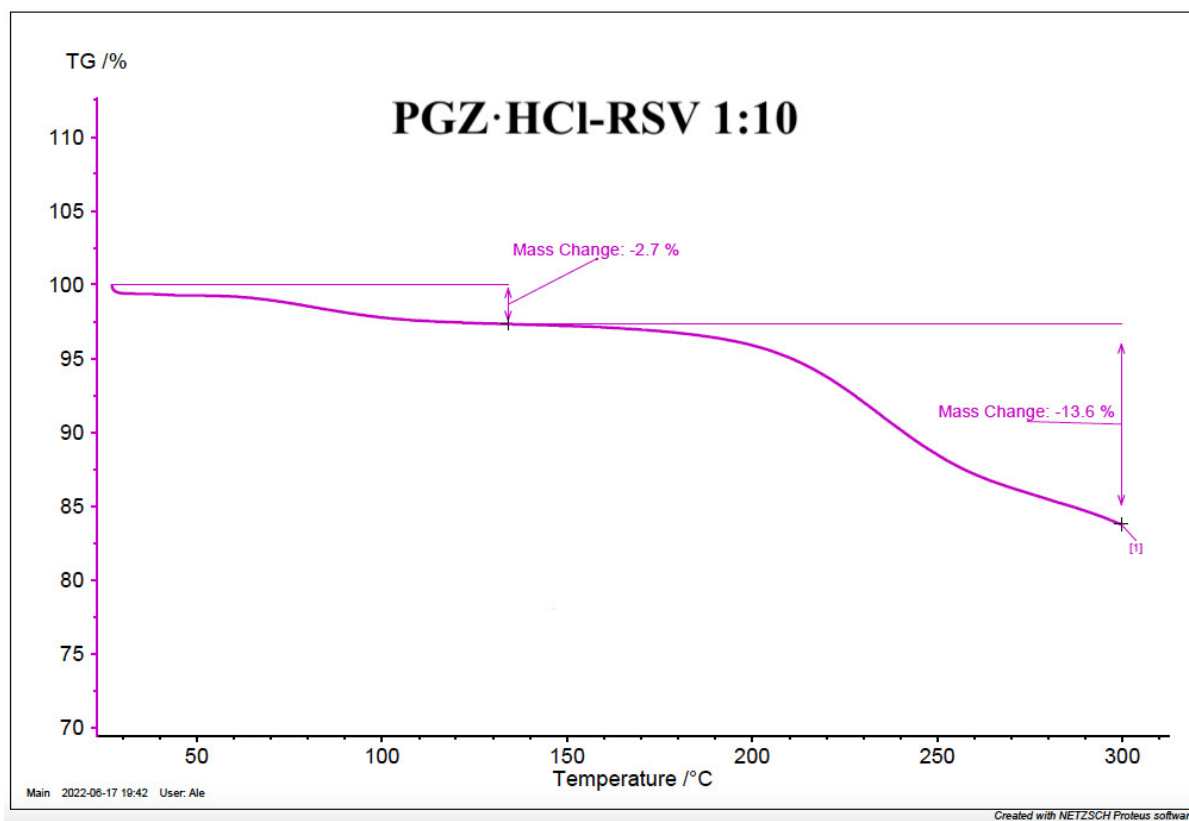

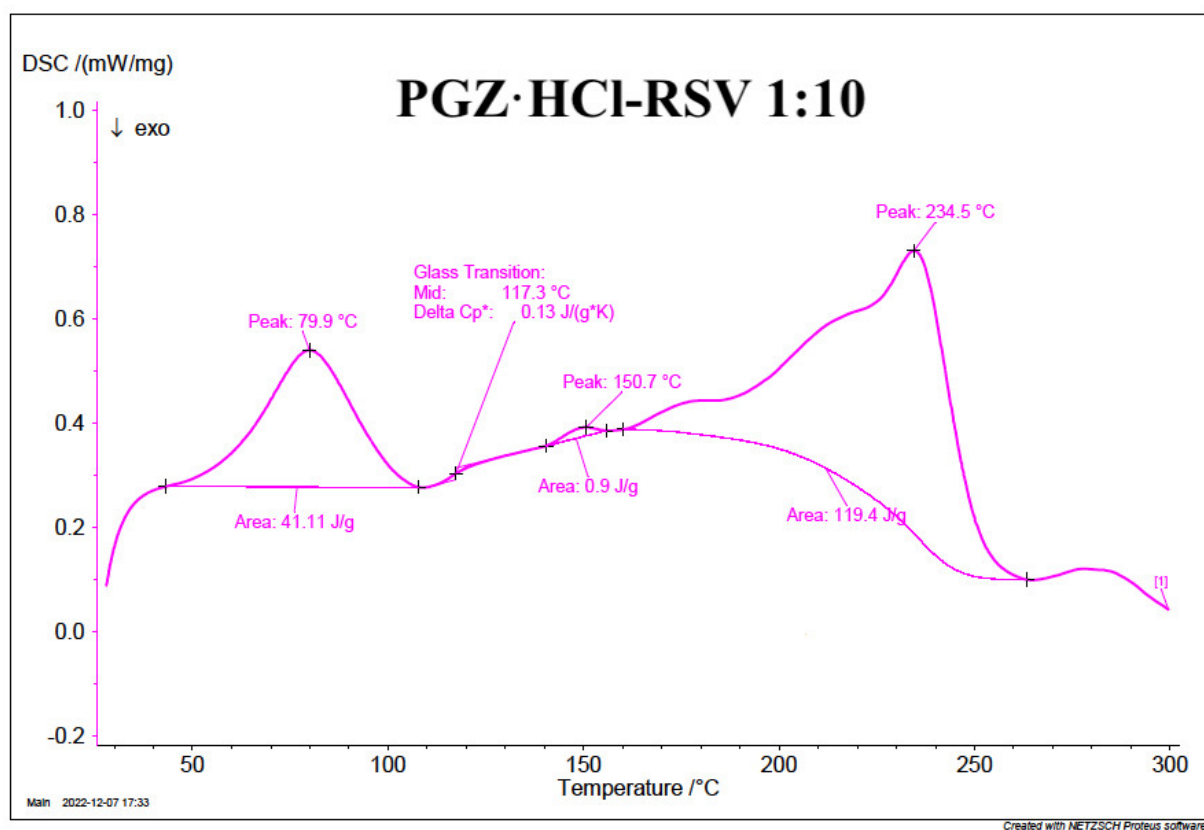

**Figure S7.** Individual DSC-TGA thermograms of the solid forms of PGZ·HCl-RSV at different stoichiometric ratios (1:2; 1:4; 1:6; 1:8 and 1:10)

### RSV ball-milling amorphization 30 min

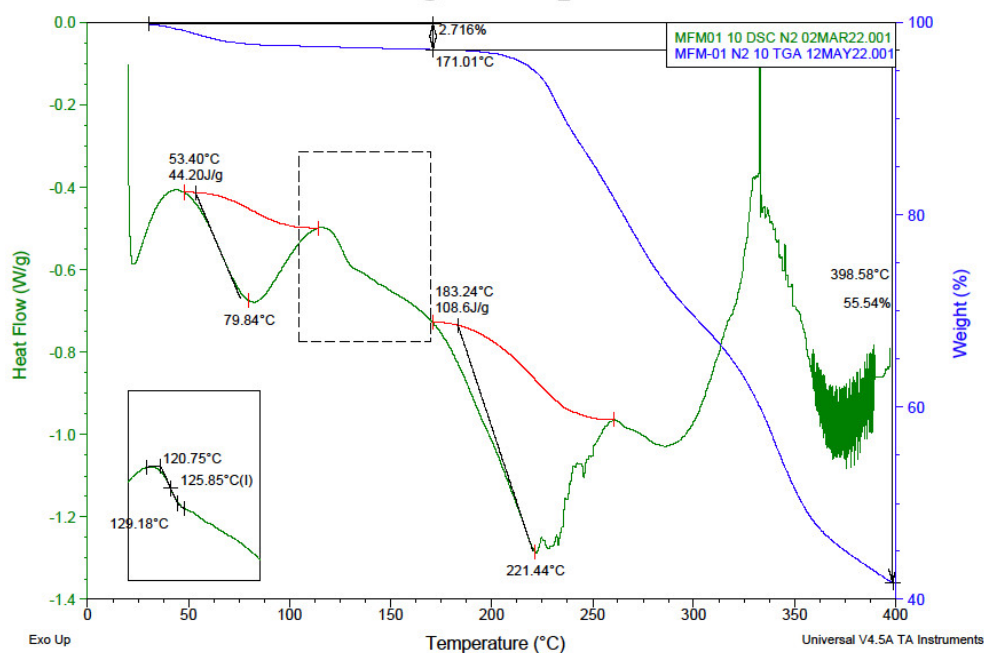

### RSV ball-milling amorphization 60 min

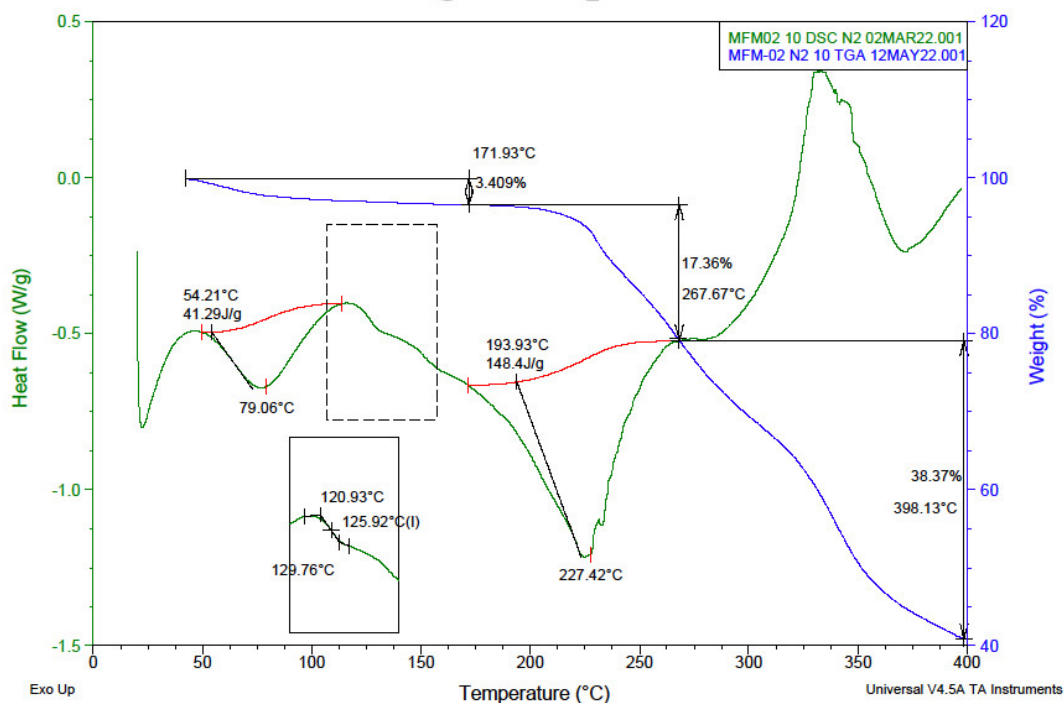

### RSV ball-milling amorphization 90 min

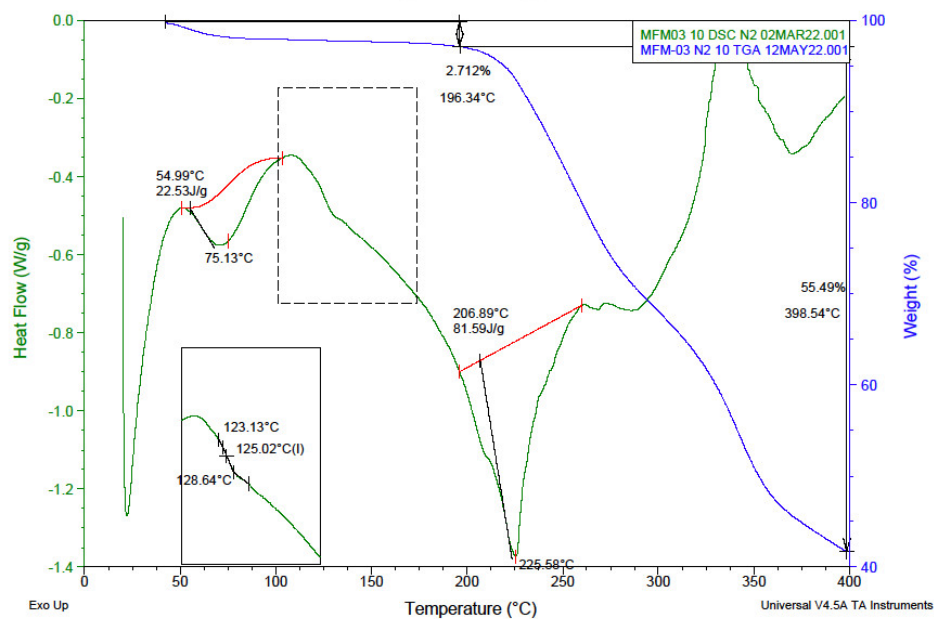

### RSV ball-milling amorphization 120 min

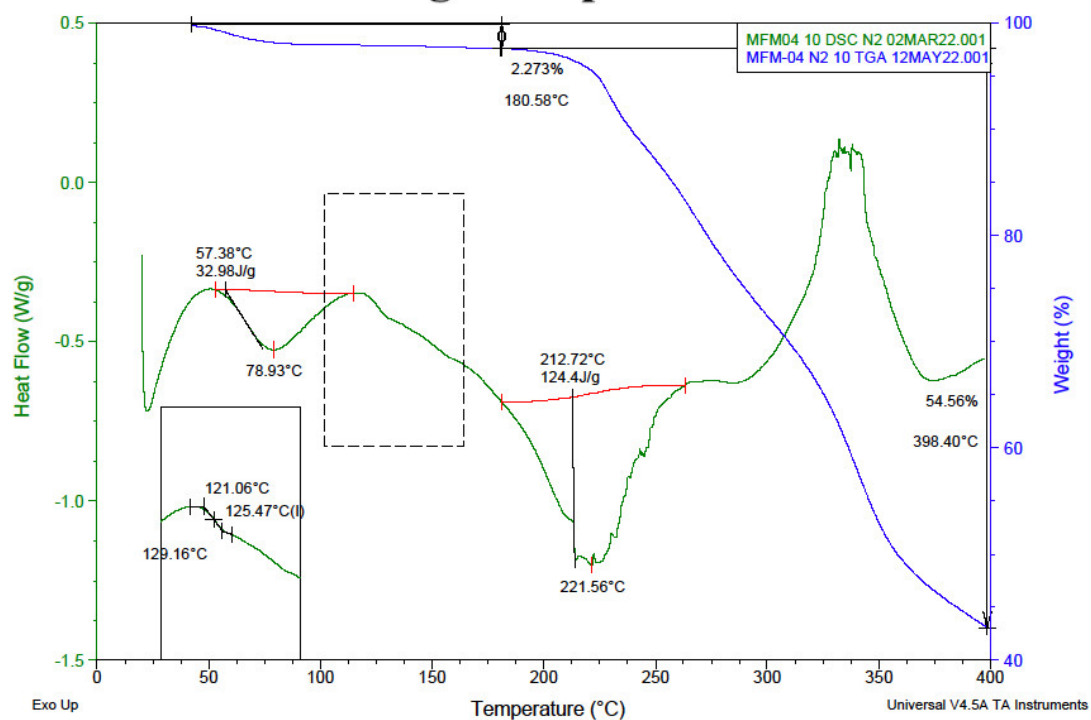

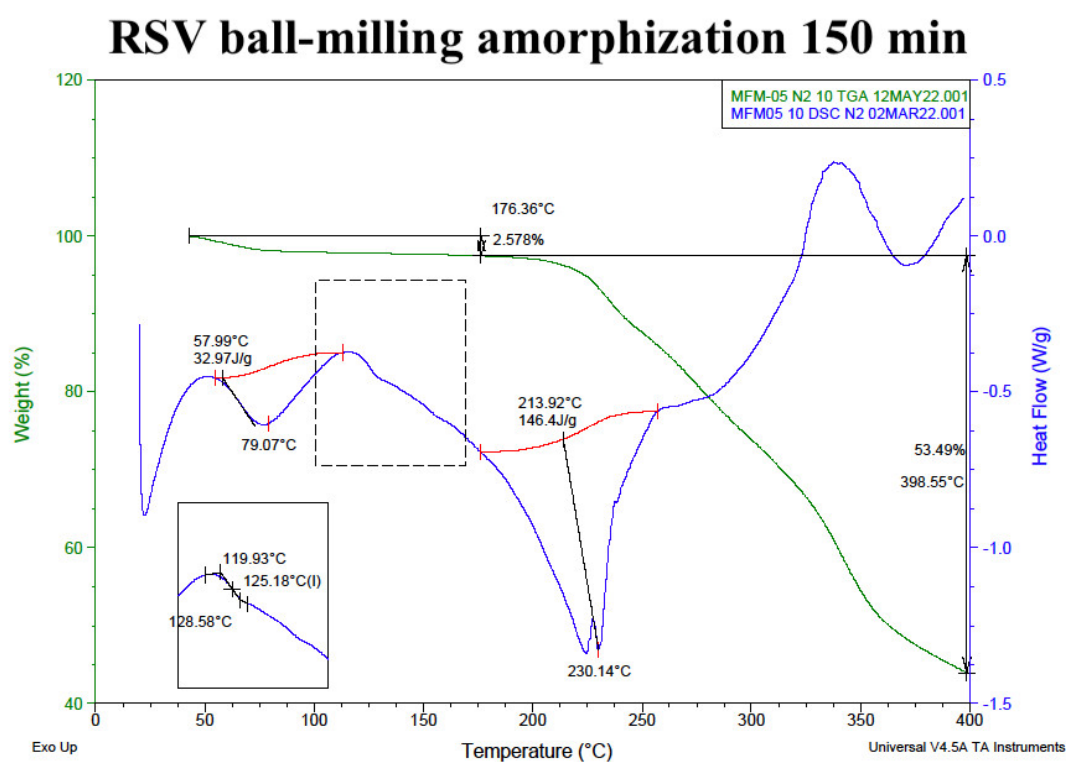

**Figure S8.** RSV amorphization at different times of ball-milling.

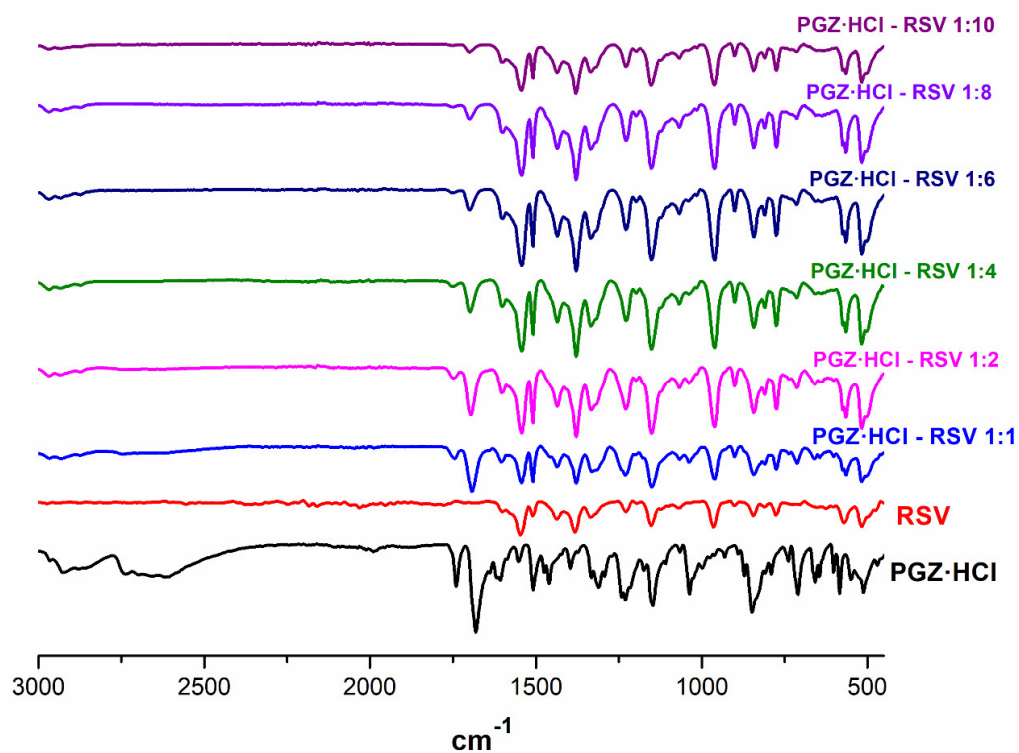

**Figure S9.** Full FT-IR spectra of the solid forms of PGZ·HCl-RSV at different stoichiometric ratios (1:1; 1:2; 1:4; 1:6; 1:8 and 1:10)

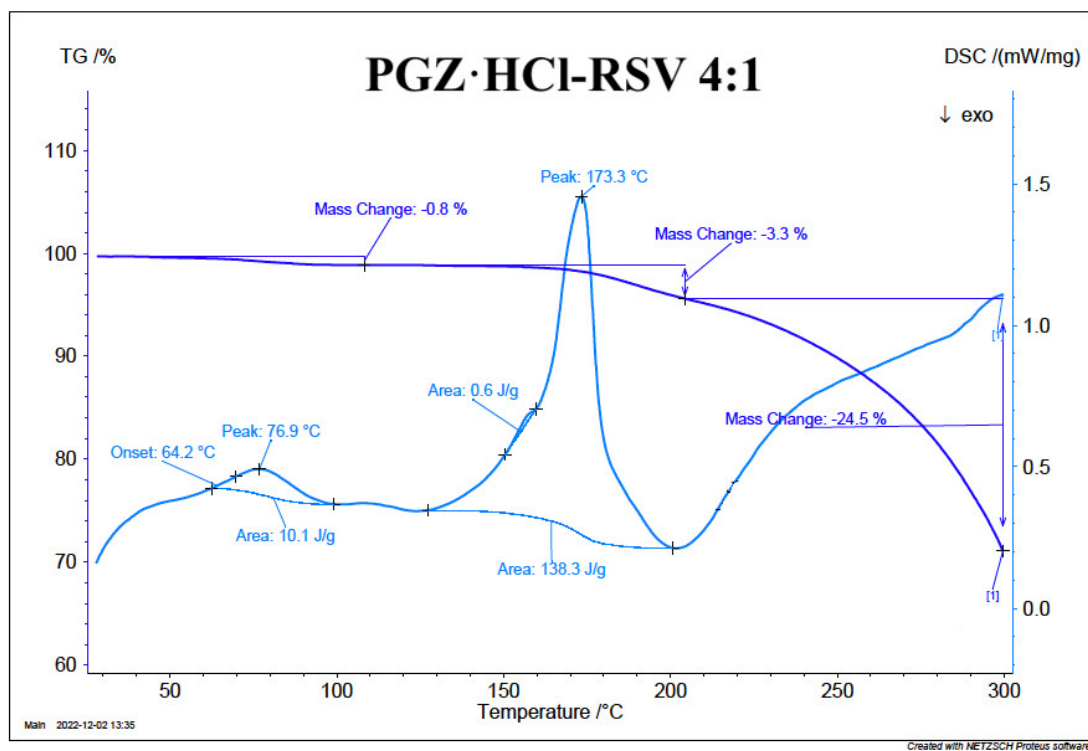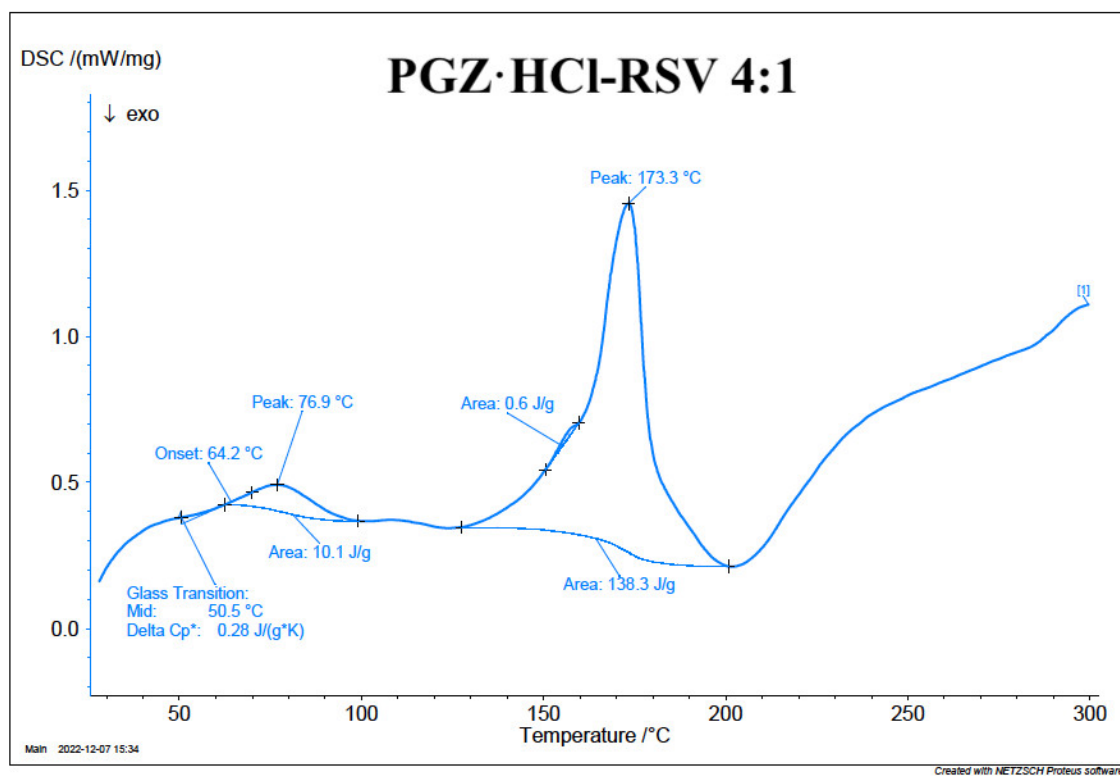

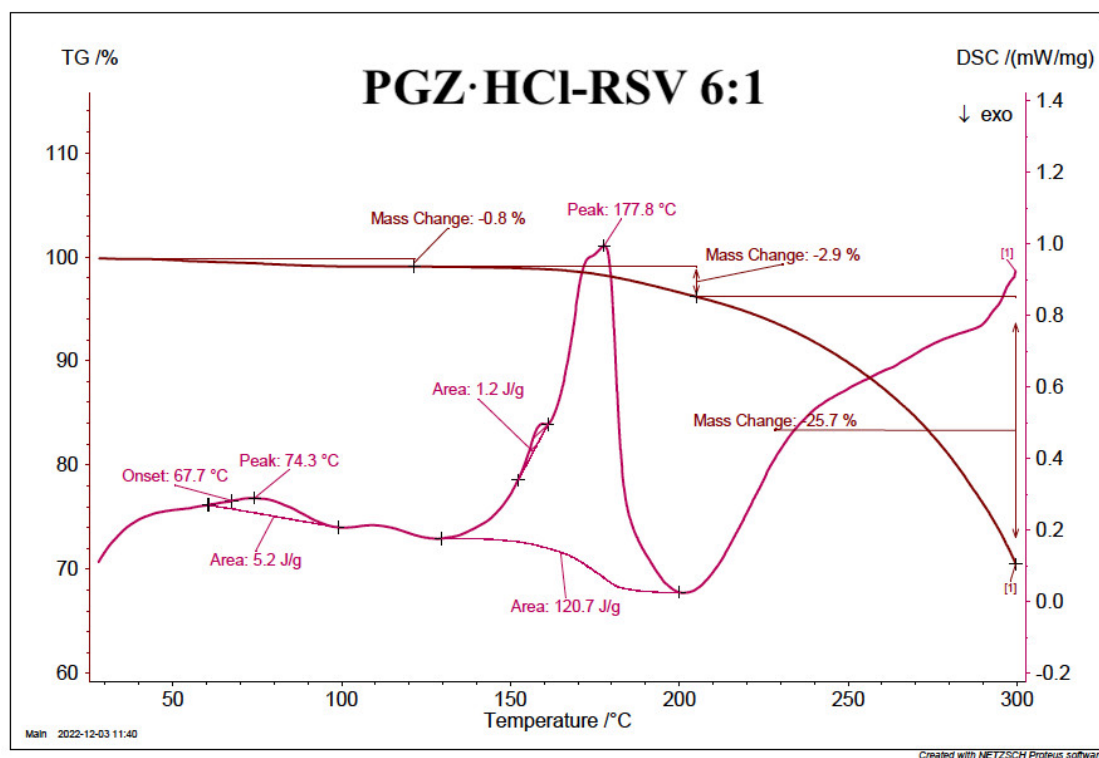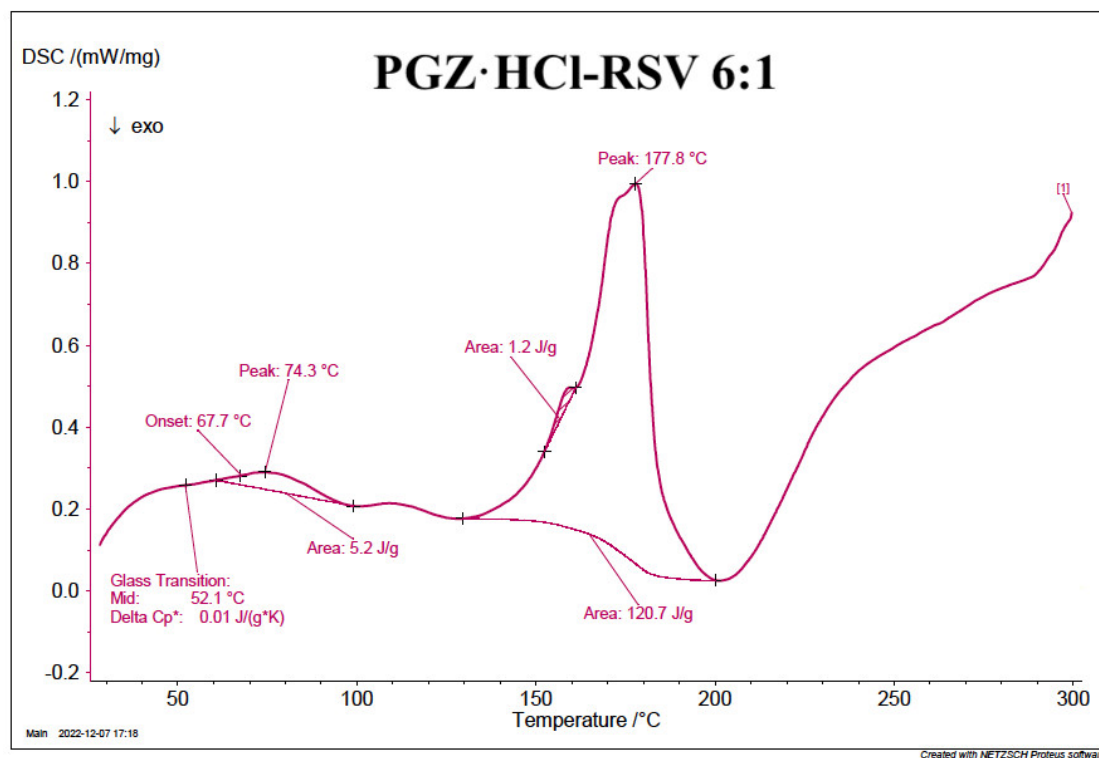

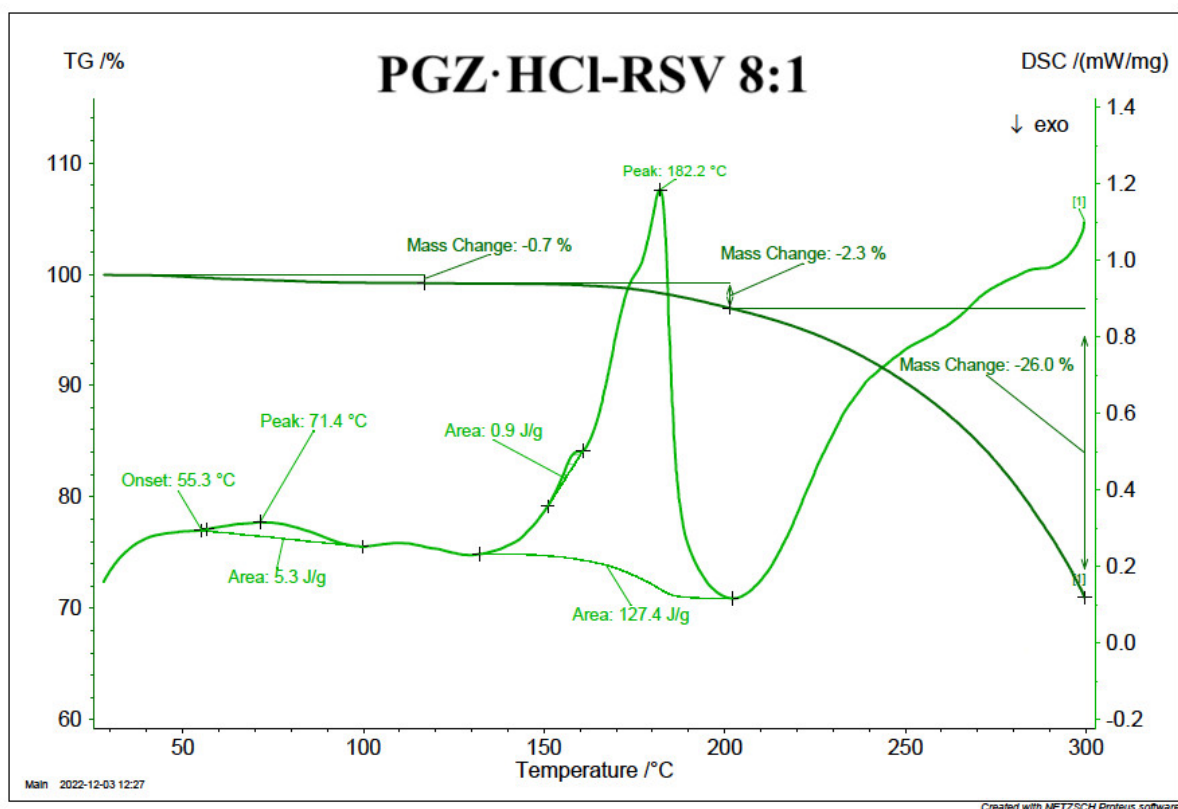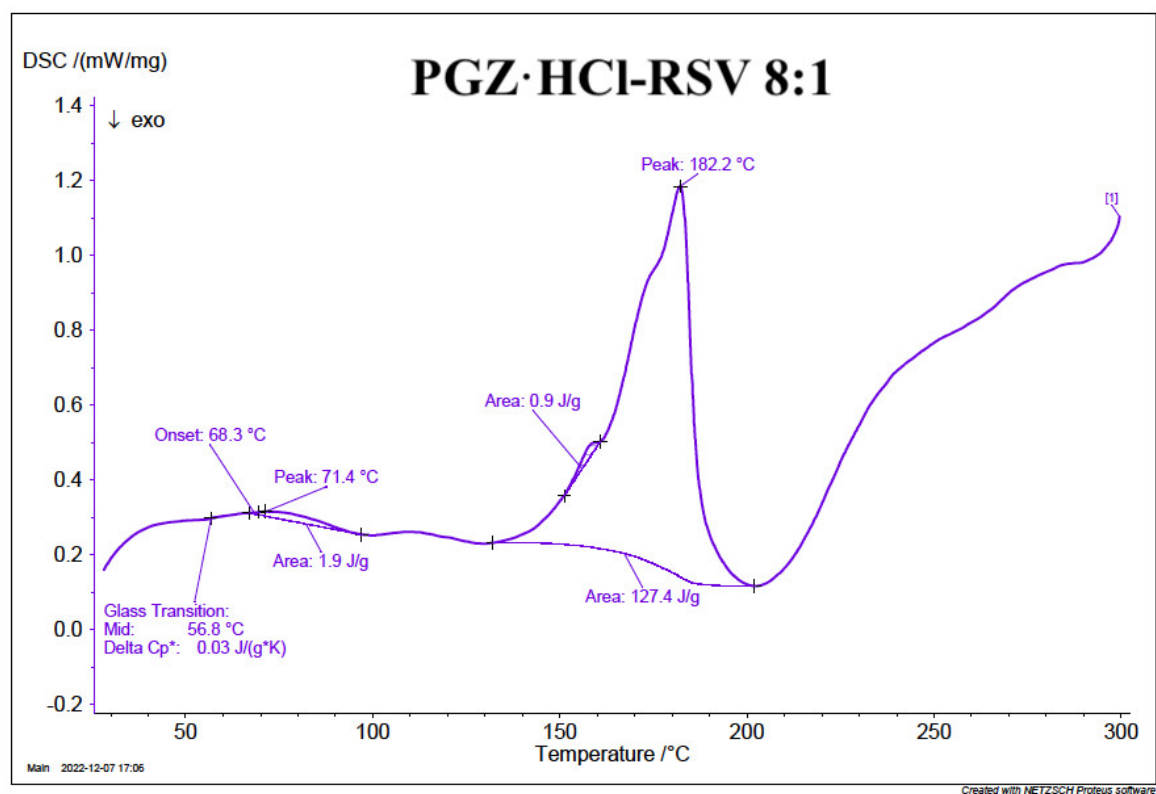

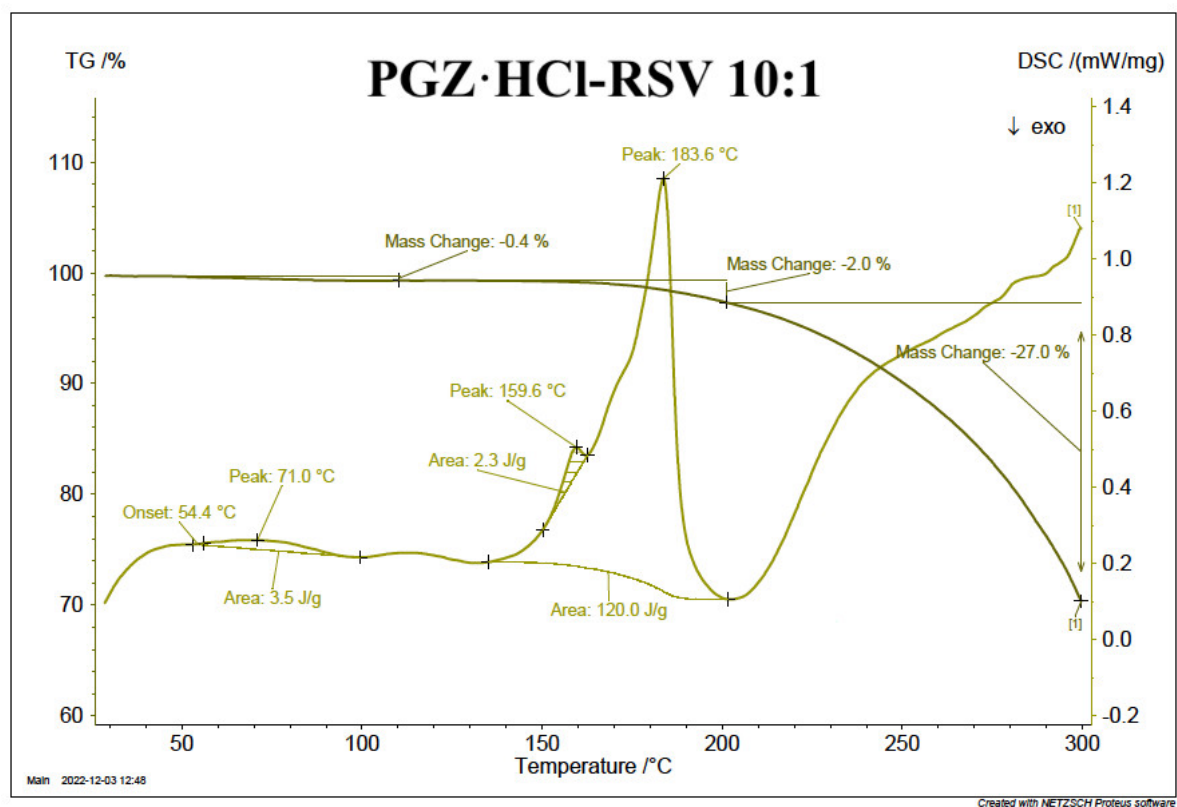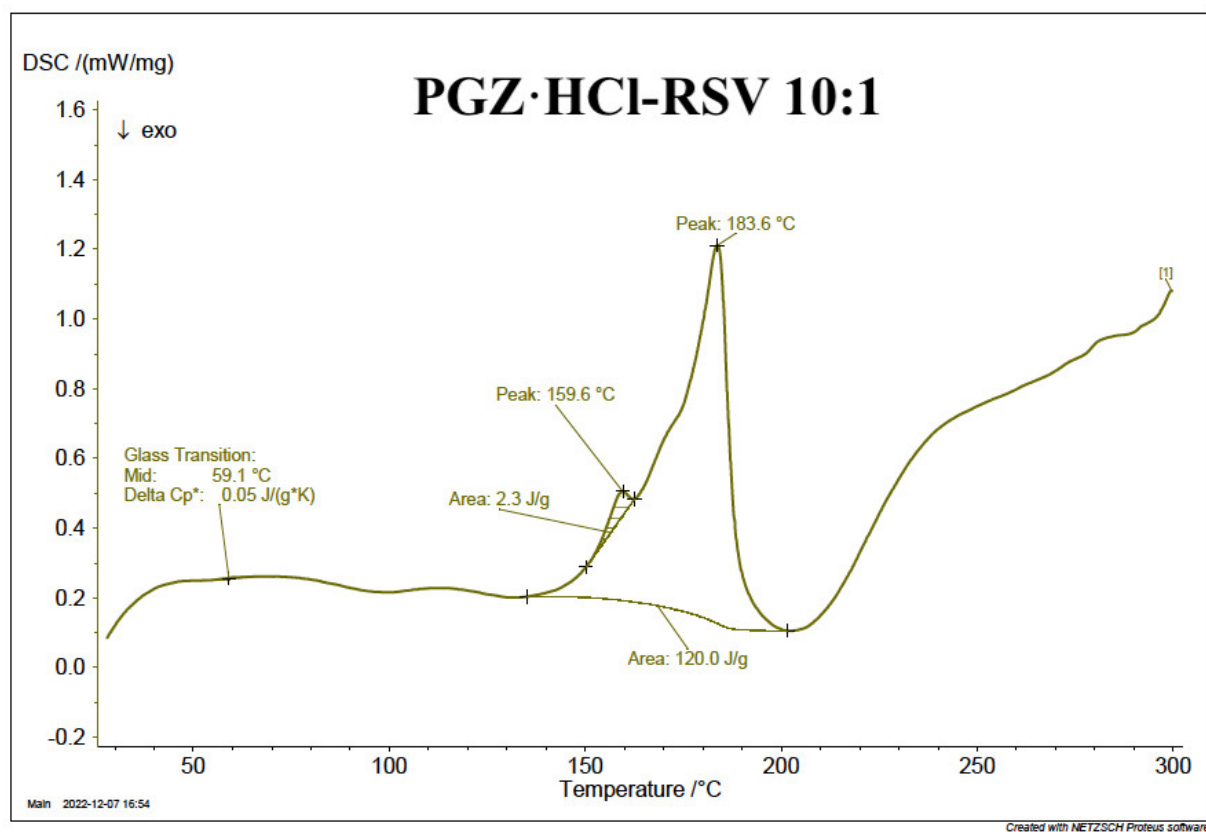

**Figure S10.** Individual DSC-TGA thermograms of the solid forms of PGZ·HCl-RSV at different stoichiometric ratios (4:1; 6:1; 8:1 and 10:1)

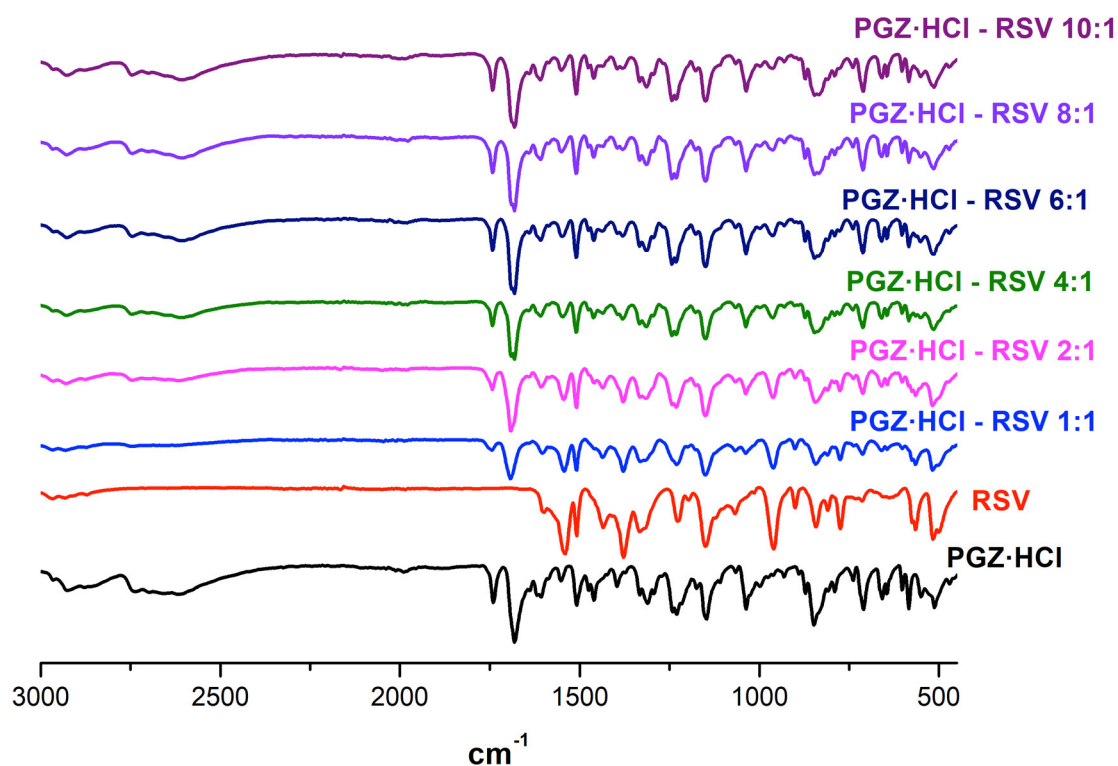

**Figure S11.** Full FT-IR spectra of the solid forms of PGZ·HCl-RSV at different stoichiometric ratios (1:1; 2:1; 4:1; 6:1; 8:1 and 10:1)

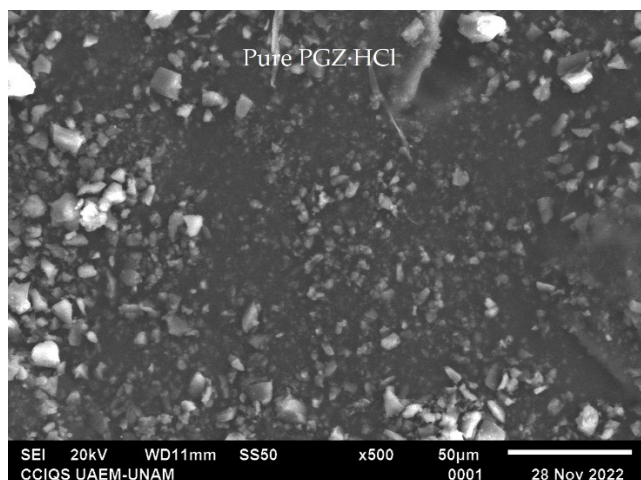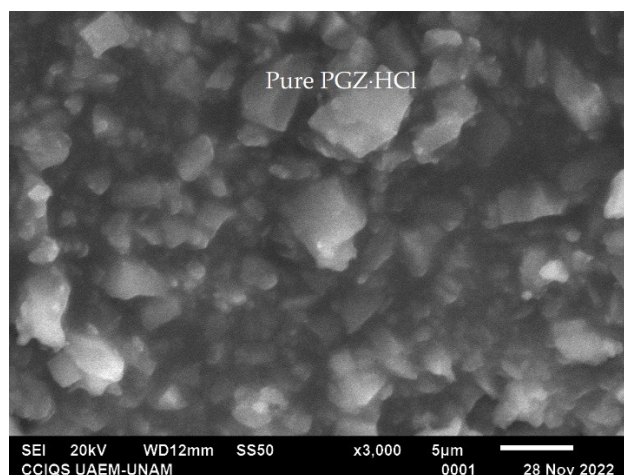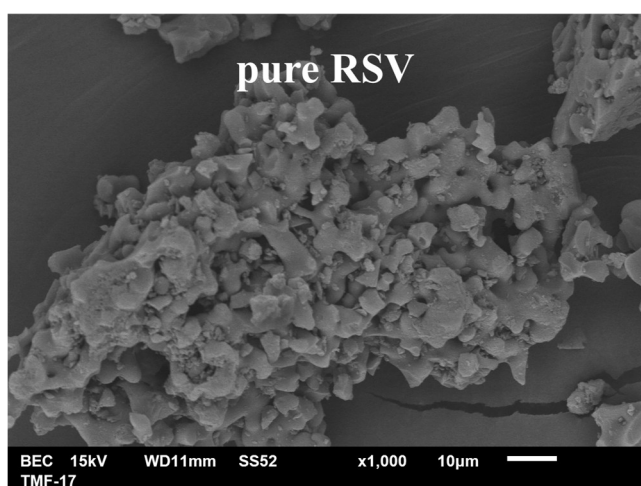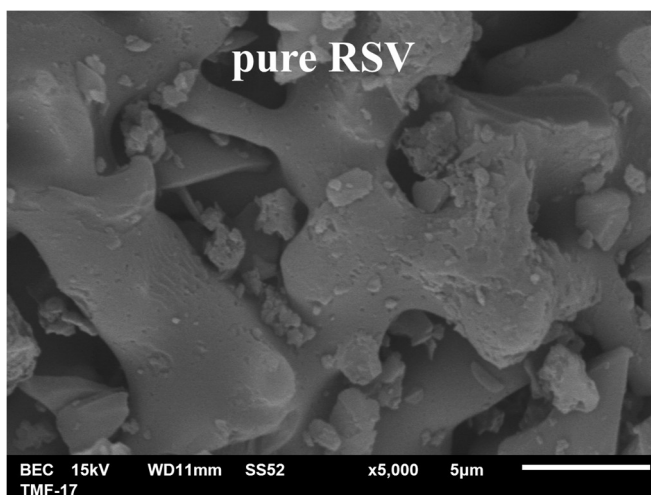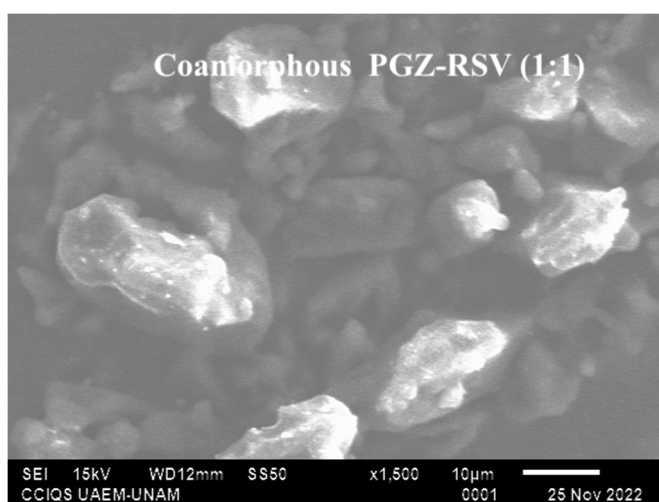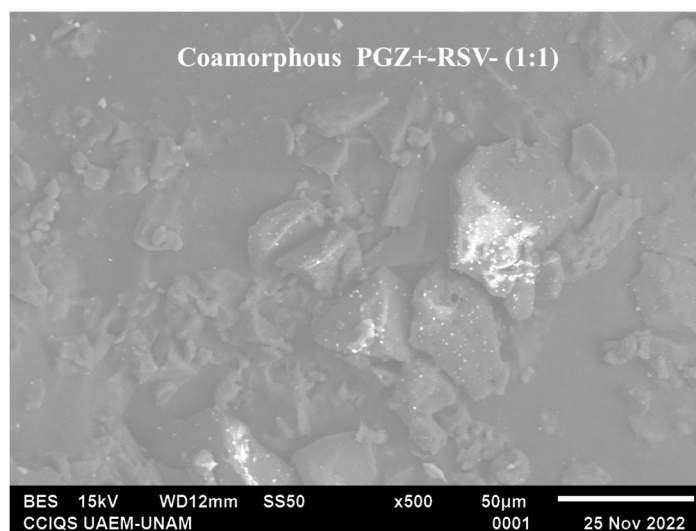

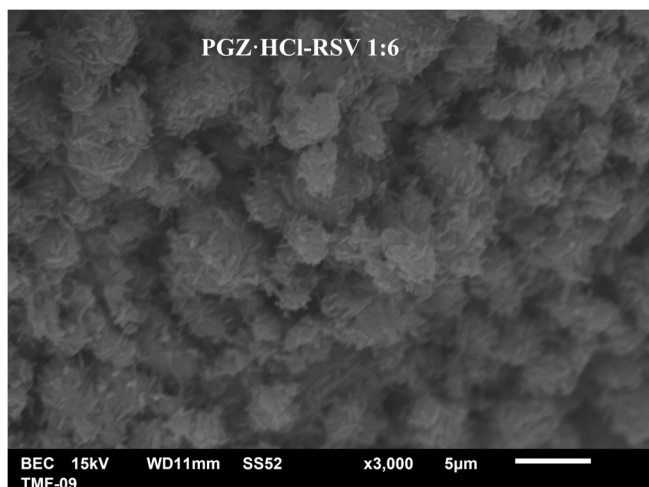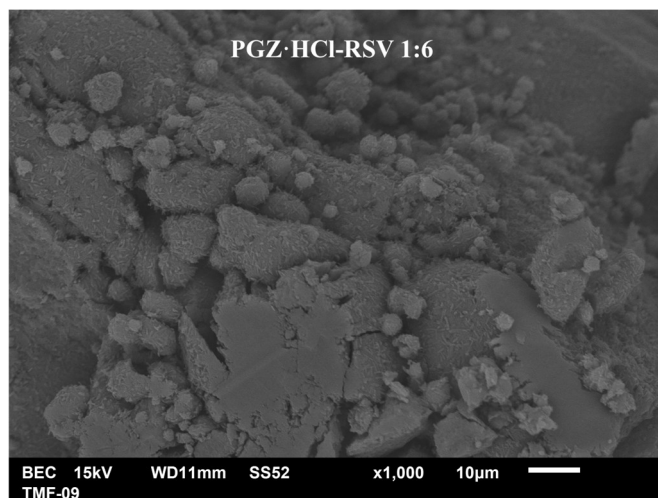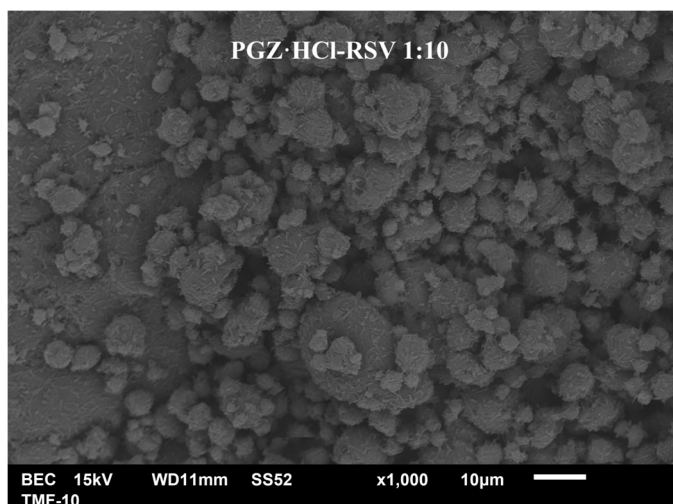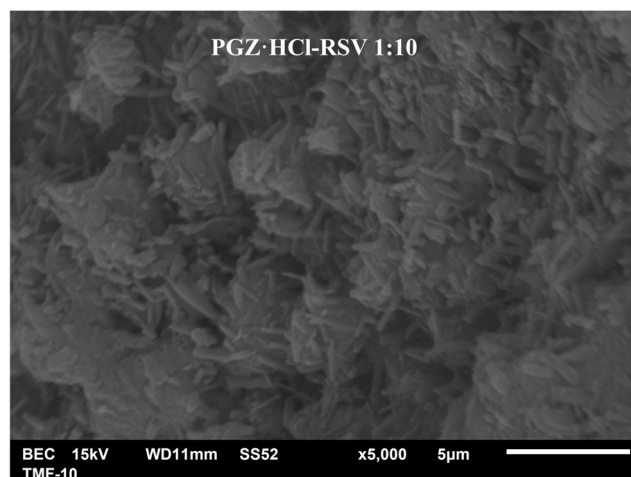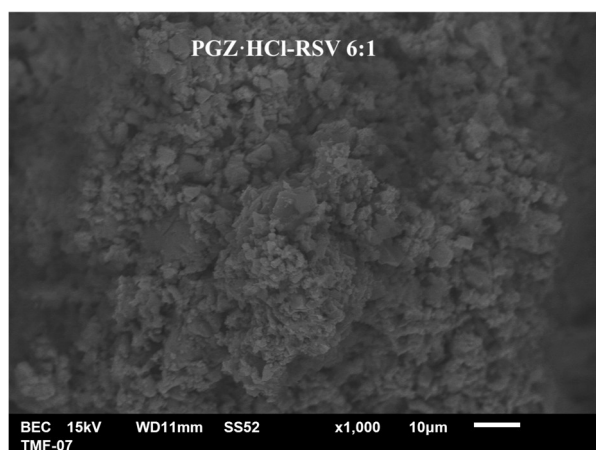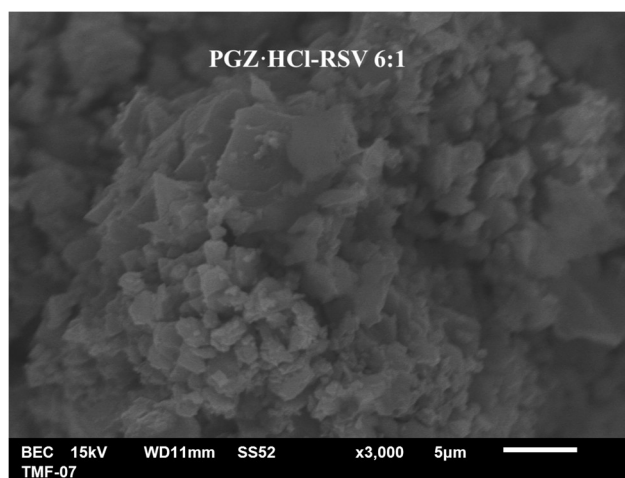

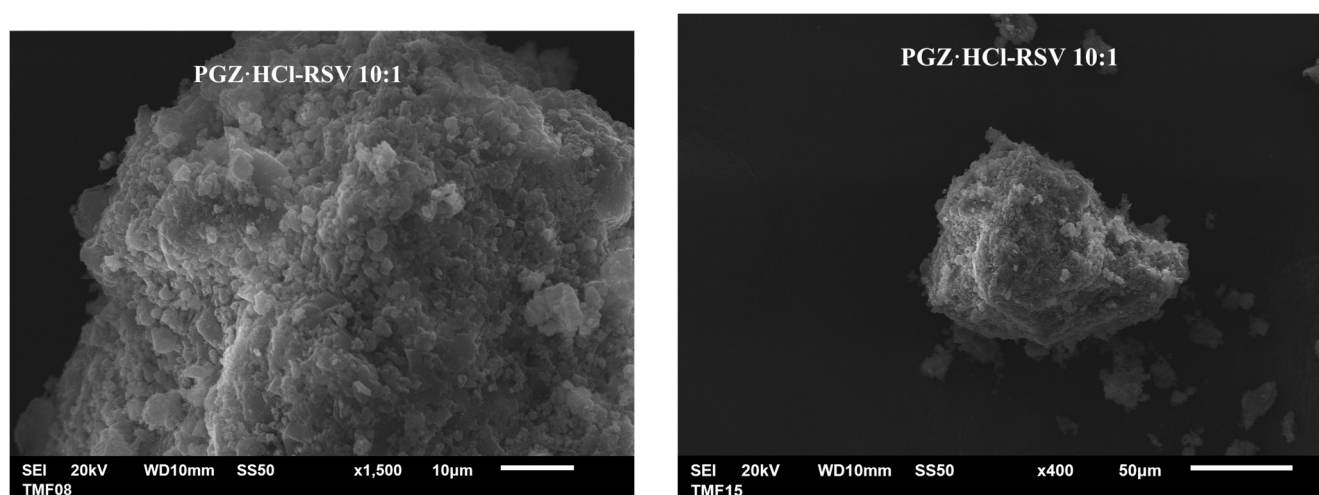

**Figure S12.** Grain morphology images of the solid forms (1:1; 1:6; 1:10; 6:1; and 10:1)
